# Supplementary material
Source: PubMed Central journal article supplement (PMC4718547)

Captions for Supplementary Materials:

**Figure 1**

Manhattan plots of all 21 GWAS for clinical lab measures and the results of the following ICD-9 based PheWAS. For each of 21 clinical lab measures, the results of associations are marked as  $-\log_{10}$  of the p-value in red, with the abbreviation of each clinical lab measure indicated above each plot, abbreviations explained in Table 1. Plotted in blue are  $-\log_{10}$ (p-value) from the associations of distinct ICD-9 code based case/control diagnoses. All results are from p-values  $< 0.01$ . The red dashed line in each Manhattan plot is at the Bonferroni corrected p-value of  $1.37 \times 10^{-8}$  for the clinical lab GWAS, and the blue dashed line is the Bonferroni corrected p-value  $4.9 \times 10^{-6}$  for the ICD-9 diagnoses based PheWAS.

**Figure 2a**

Comparison of significant SNPs between clinical lab measures and ICD-9 code PheWAS. The x-axis has the clinical lab measures and y-axis shows its association p-value with the SNP, where red dots are the top SNPs from clinical lab PheWAS and blue triangle are the same SNPs associated with ICD-9 diagnoses. Table 2 lists what the ICD-9 diagnoses were for each of the clinical lab measures.

**Figure 2b**

In this chromosomal ideogram, lines link SNP chromosomal locations to colored diamonds (representing clinical lab measures) or circles (representing ICD-9 diagnoses) showing the cross-phenotype associations for the SNPs identified first with associations with clinical lab measures.

**Figure 3**

Spectrum of phenotypic associations for *LDLR* SNP rs6511720, for PheWAS p-values  $< 0.01$ . This SNP was originally associated in our study with the clinical lab measure of LDL.

**Supplementary Table 1**

Associations passing our Bonferroni corrected p-value cutoff. The spreadsheet has three tabs: the results of the clinical lab measure GWAS, the results of the ICD-9 based PheWAS, the associations for both combined by SNP.

**Supplementary Table 2**

The spreadsheet has two tabs: the clinical lab measures, the ICD-9 code. Each tab provides total number of subjects for the clinical lab measurements, and the total number of cases/controls for the ICD-9 case/control phenotypes. It also includes total number of SNPs passing Bonferoni threshold within each clinical lab measures and ICD-9 codes.

**Supplementary Figure**

For each clinical lab measure GWAS, there is one Manhattan plot and one quantile-quantile normal plot (QQ-plot). The Manhattan plot on the left shows the p-values from each GWAS, plotted as  $-\log_{10}$  of the p-value, across all chromosomes. A red line is placed at our Bonferroni corrected p-value cutoff. On the right is a QQ-plot of all p-values from the GWAS (black points), compared to a normal distribution (red line). The calculated lambda (also known as genomic inflation factor) is noted at the top of the QQ plot, strong deviations above "1" for lambda indicate an inflation of significant p-values or strong non-normality of the distribution of p-values of the GWAS.

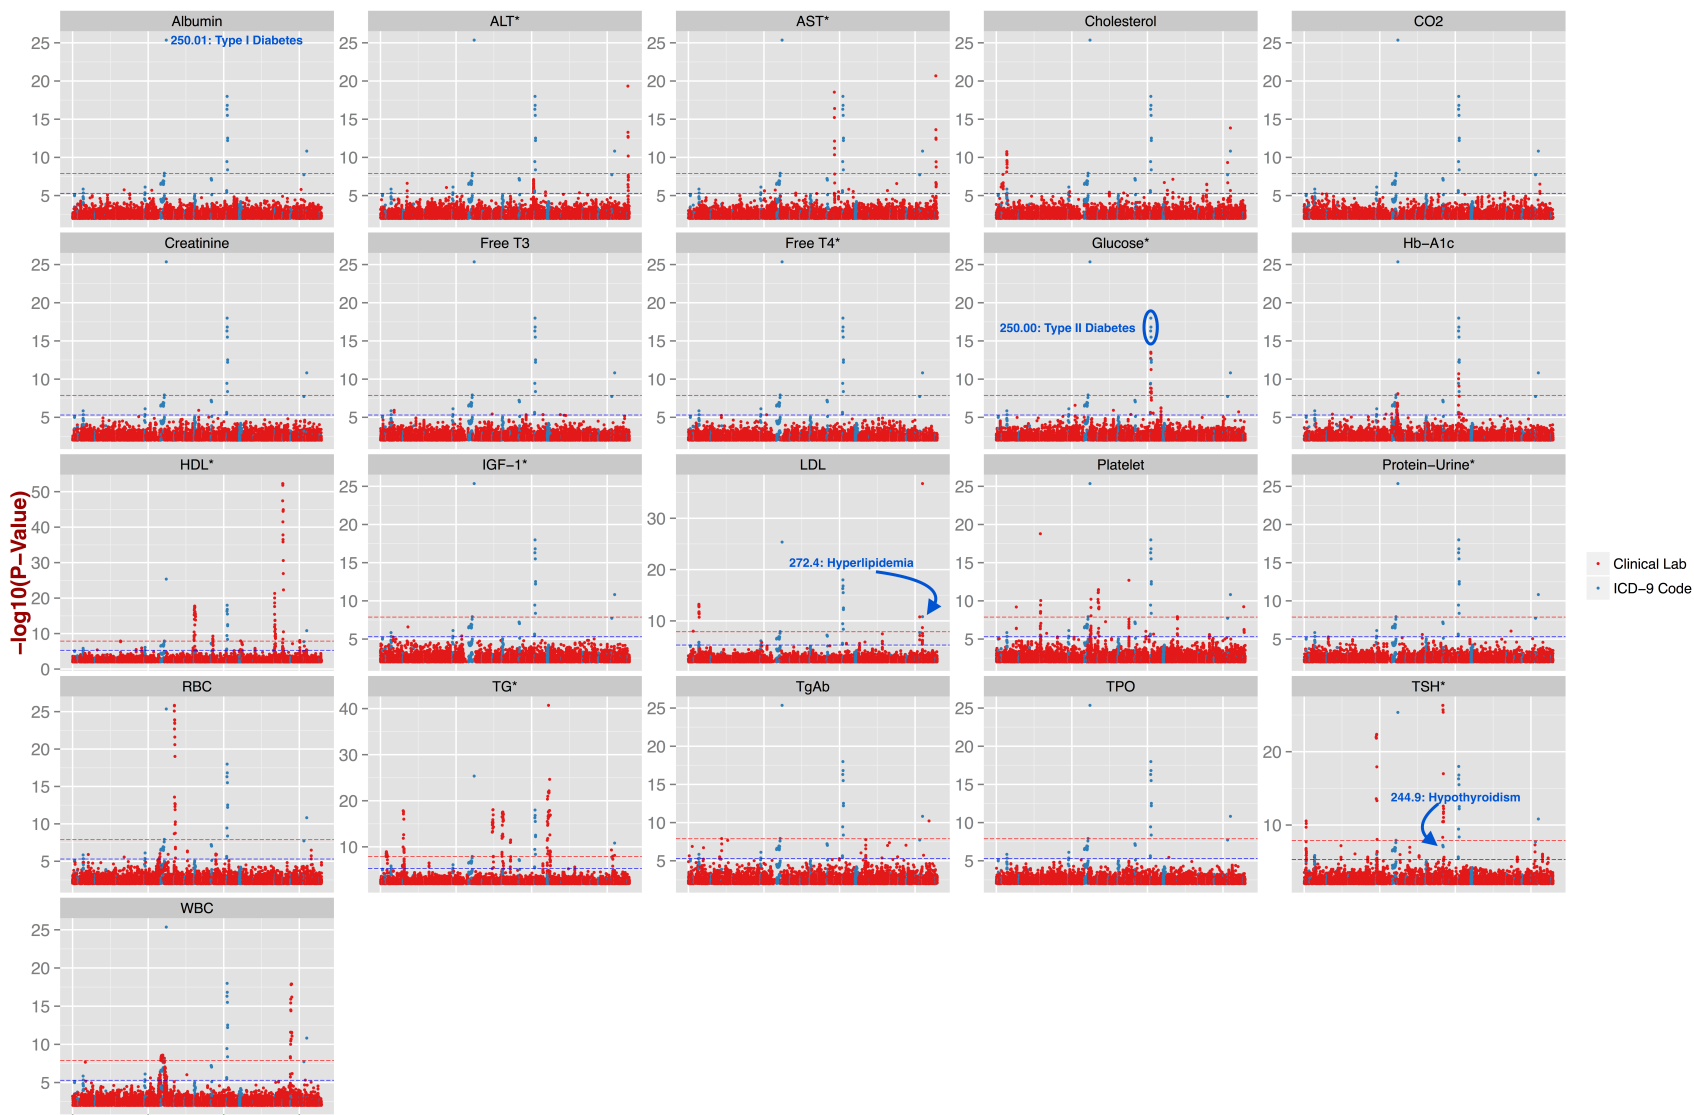

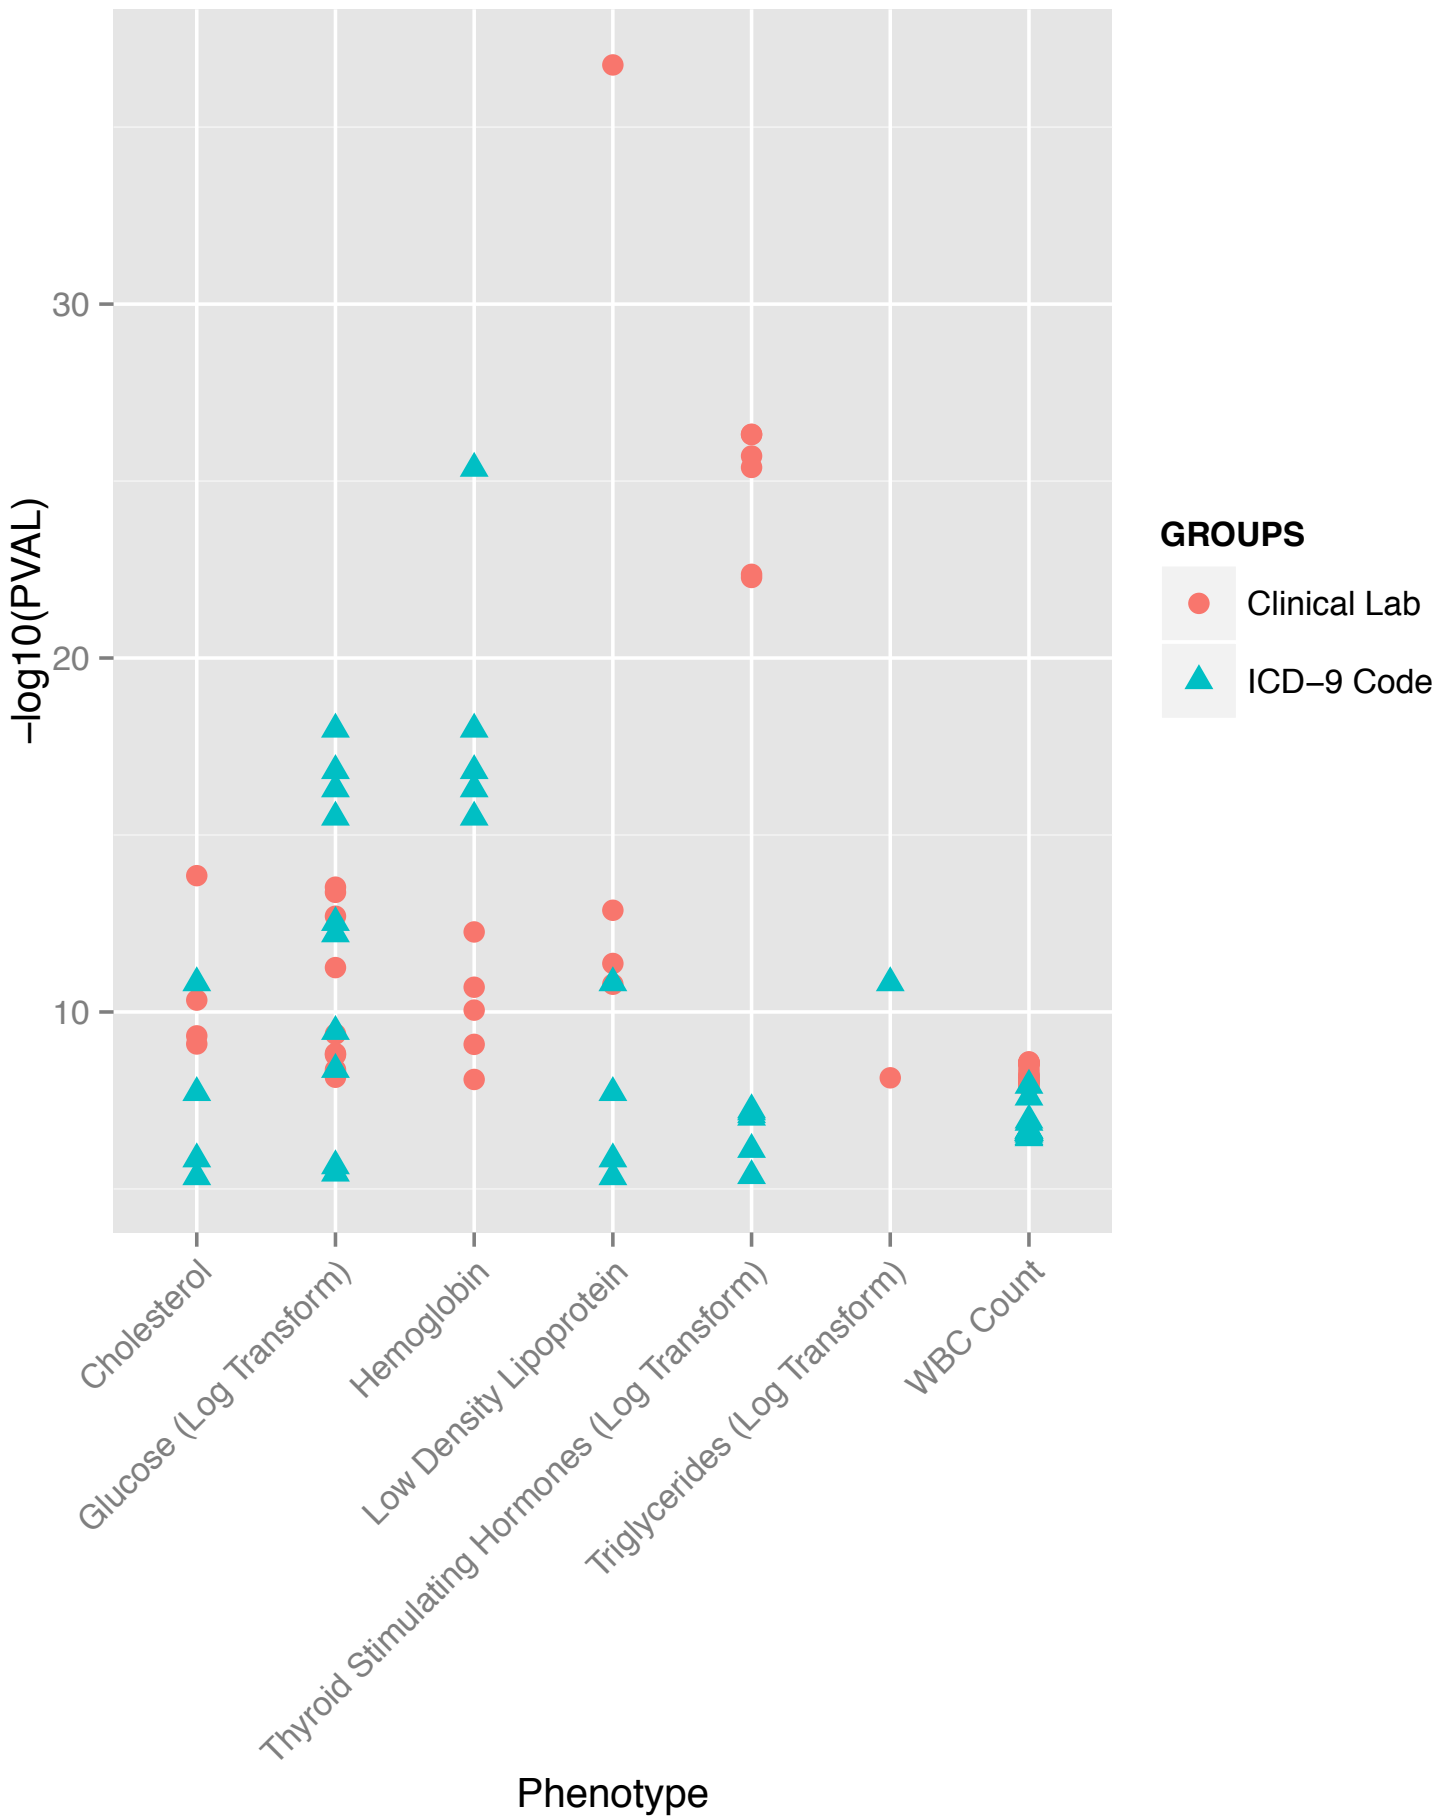

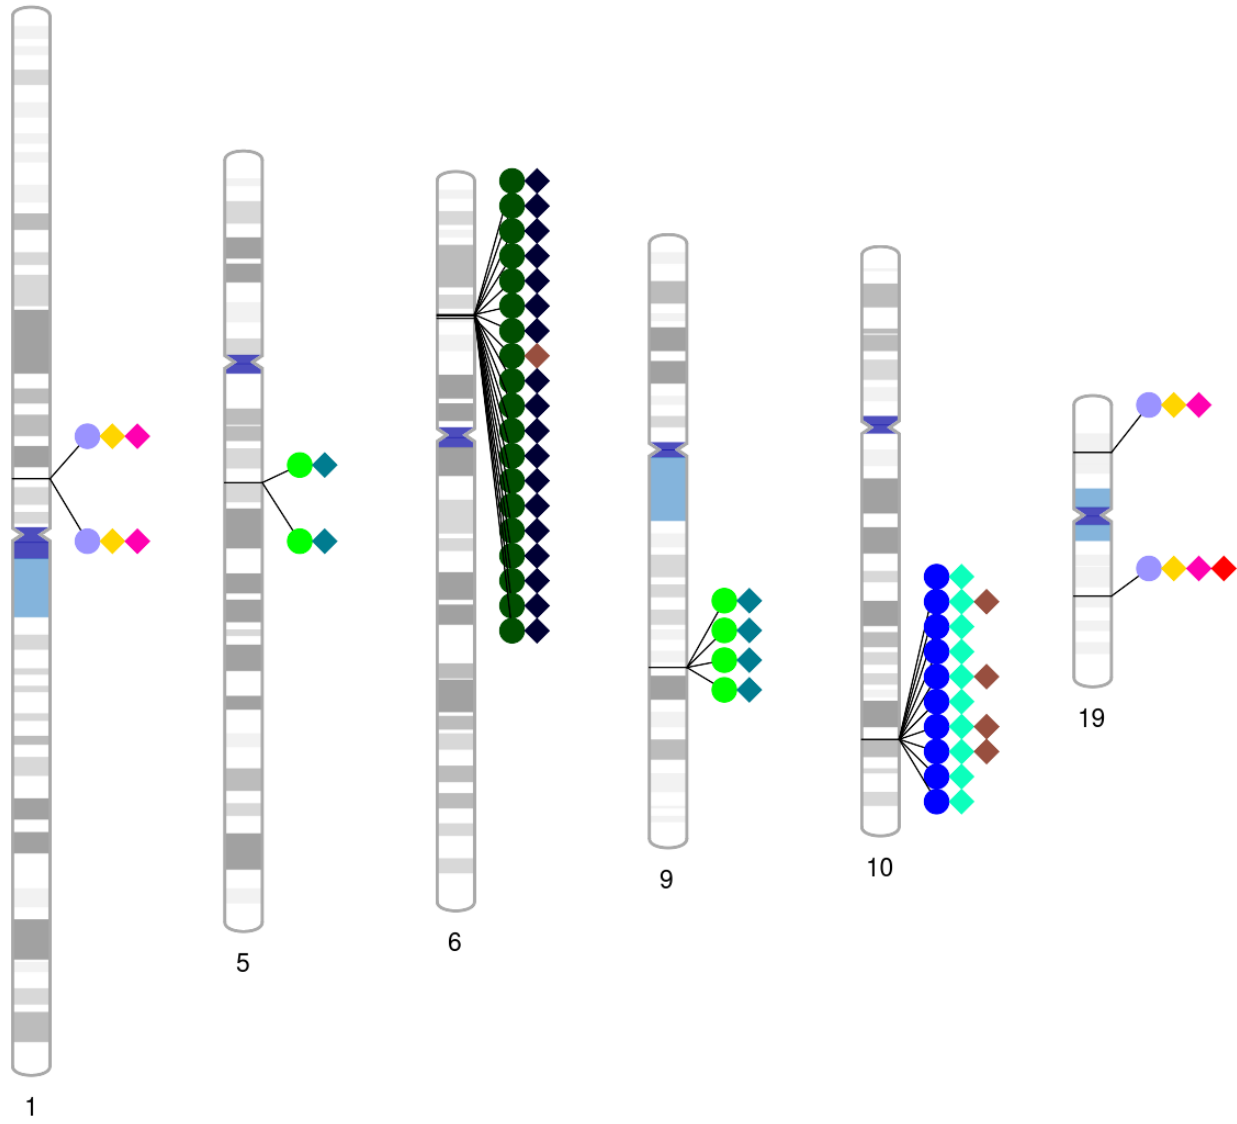

○ ICD-9 Code

◇ Clinical Lab

■ 250.01: Diabetes Mellitus Type 1

■ WBC Count

■ 244.9: Hypothyroidism

■ Thyroid Stimulating Hormones

■ 250.00: Diabetes Mellitus Type 2

■ Glucose

■ Hemoglobin

■ 272.4: Hyperlipidemia

■ Cholesterol

■ Low Density Lipoprotein

■ Triglycerides

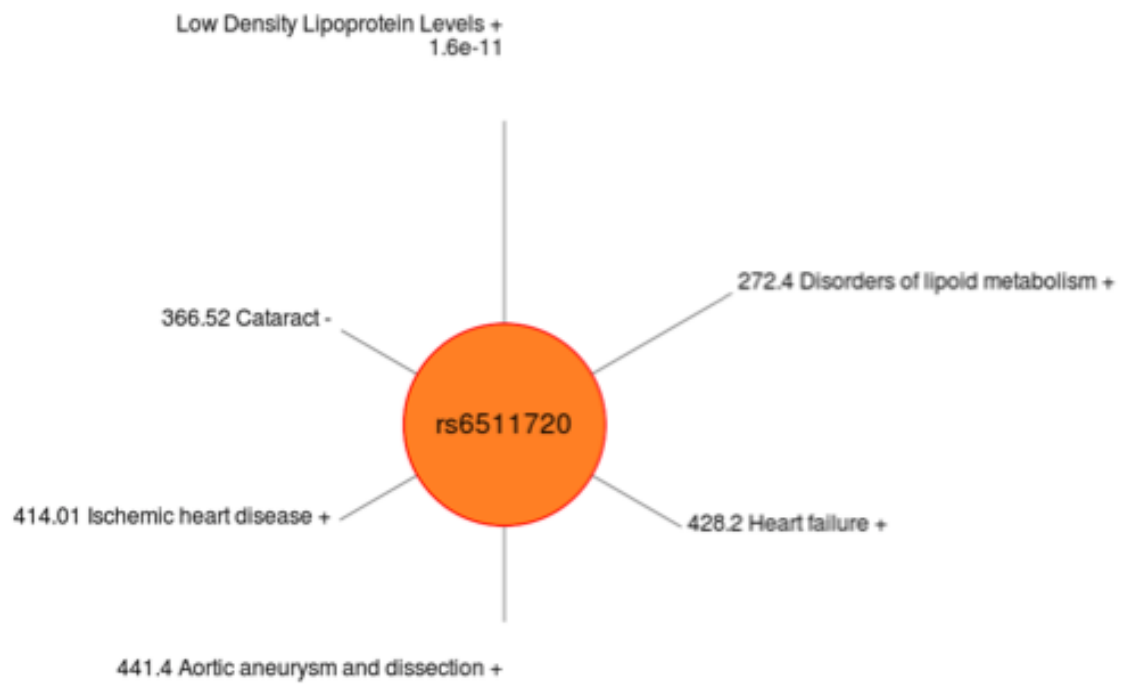





|                |            |                                                  |      |             |          |         |       |          |          |
|----------------|------------|--------------------------------------------------|------|-------------|----------|---------|-------|----------|----------|
| MHS-SAPCD1.MHS | rs1171574  | White Blood Cell Count                           | 6    | 3125230 G   | 0.0      | 0.26    | 0.13  | 0.044    | 2.72E-09 |
| MHS-SAPCD1.MHS | rs1171574  | White Blood Cell Count                           | 6    | 3125230 A   | 0.0      | 0.26    | 0.13  | 0.044    | 2.78E-09 |
| MHS-SAPCD1.MHS | rs1171574  | White Blood Cell Count                           | 6    | 3125231 G   | 0.0      | 0.26    | 0.13  | 0.044    | 2.80E-09 |
| MHS-SAPCD1.MHS | rs1171574  | White Blood Cell Count                           | 6    | 3125231 A   | 0.0      | 0.26    | 0.13  | 0.044    | 2.82E-09 |
| MHS-SAPCD1.MHS | rs1171574  | White Blood Cell Count                           | 6    | 3125232 G   | 0.0      | 0.26    | 0.13  | 0.044    | 2.84E-09 |
| MHS-SAPCD1.MHS | rs1171574  | White Blood Cell Count                           | 6    | 3125232 A   | 0.0      | 0.26    | 0.13  | 0.044    | 2.86E-09 |
| AKAI           | rs8847300  | High Density Lipoprotein (Eq. Transformation)    | 9    | 30748400 G  | 0.08     | 0.03    | 0.12  | 0.006    | 2.98E-09 |
| AKAI           | rs8847300  | High Density Lipoprotein (Eq. Transformation)    | 9    | 30748400 A  | 0.08     | 0.03    | 0.12  | 0.006    | 3.00E-09 |
| MHS-SAPCD1.MHS | rs1171580  | White Blood Cell Count                           | 6    | 3171580 T   | 0.0      | 0.26    | 0.13  | 0.044    | 3.10E-09 |
| MHS-SAPCD1.MHS | rs1171580  | White Blood Cell Count                           | 6    | 3171580 A   | 0.0      | 0.26    | 0.13  | 0.044    | 3.12E-09 |
| DOCK7          | rs162860   | Tyrosinase (Eq. Transformation)                  | 1    | 6366990 C   | 0.07     | 0.04    | 0.09  | 0.007    | 3.47E-09 |
| NA             | rs1748195  | Tyrosinase (Eq. Transformation)                  | 1    | 6366990 G   | 0.07     | 0.04    | 0.09  | 0.007    | 3.47E-09 |
| NA             | rs1748195  | Tyrosinase (Eq. Transformation)                  | 1    | 6366990 T   | 0.06     | 0.02    | 0.08  | 0.004    | 3.78E-09 |
| NA             | rs4484415  | Tyrosinase (Eq. Transformation)                  | 8    | 19776981 A  | 0.05     | 0.05    | 0.12  | 0.009    | 3.84E-09 |
| NA             | rs4484415  | Tyrosinase (Eq. Transformation)                  | 8    | 19776981 T  | 0.05     | 0.05    | 0.12  | 0.009    | 3.86E-09 |
| ARHGFB3        | rs13021374 | Plasmin                                          | 3    | 5695668 G   | 0.05     | 0.45    | 0.07  | 0.717    | 4.10E-09 |
| NA             | rs4484415  | High Density Lipoprotein (Eq. Transformation)    | 8    | 19776981 A  | 0.05     | 0.05    | 0.12  | 0.009    | 4.06E-09 |
| NA             | rs4484415  | High Density Lipoprotein (Eq. Transformation)    | 8    | 19776981 T  | 0.05     | 0.05    | 0.12  | 0.009    | 4.12E-09 |
| NA             | rs8729416  | White Blood Cell Count                           | 17   | 38507314 T  | 0.04     | -0.15   | -0.08 | 0.016    | 4.12E-09 |
| NA             | rs8729416  | White Blood Cell Count                           | 17   | 38507314 A  | 0.04     | 0.26    | 0.13  | 0.044    | 4.20E-09 |
| SK1            | rs872028   | Tyrosinase (Eq. Transformation)                  | 11   | 11574021 T  | 0.06     | -0.06   | -0.12 | 0.010    | 4.28E-09 |
| TGFB2          | rs12124326 | Glucuronidase (Eq. Transformation)               | 10   | 11459883 T  | 0.72     | 0.02    | -0.09 | 0.003    | 4.29E-09 |
| NA             | rs137782   | Thyroid Stimulating Hormone (Eq. Transformation) | 9    | 30054380 G  | 0.02     | 0.04    | -0.09 | 0.006    | 4.71E-09 |
| DOCK7          | rs1748195  | Tyrosinase (Eq. Transformation)                  | 1    | 6366990 C   | 0.07     | 0.04    | 0.09  | 0.007    | 4.82E-09 |
| DOCK7          | rs162860   | Tyrosinase (Eq. Transformation)                  | 1    | 6366990 T   | 0.07     | 0.04    | 0.09  | 0.007    | 4.88E-09 |
| TGFB2          | rs7961275  | Glucuronidase (Eq. Transformation)               | 10   | 11459296 A  | 0.54     | 0.01    | -0.08 | 0.003    | 5.06E-09 |
| AKAI           | rs2341999  | High Density Lipoprotein (Eq. Transformation)    | 9    | 30748990 C  | 0.08     | 0.03    | 0.12  | 0.006    | 5.14E-09 |
| C2             | rs1052701  | White Blood Cell Count                           | 6    | 31870200 G  | 0.0      | 0.26    | 0.13  | 0.044    | 5.17E-09 |
| DOCK7          | rs2078917  | Tyrosinase (Eq. Transformation)                  | 1    | 6307295 A   | 0.07     | 0.04    | 0.09  | 0.007    | 5.95E-09 |
| CGMNA          | rs1929201  | White Blood Cell Count                           | 12   | 31832924 T  | 0.26     | 0.15    | 0.08  | 0.006    | 5.97E-09 |
| MHS-SAPCD1.MHS | rs1171577  | White Blood Cell Count                           | 6    | 3127274 A   | 0.0      | 0.26    | 0.13  | 0.044    | 6.10E-09 |
| MHS-SAPCD1.MHS | rs1171577  | White Blood Cell Count                           | 6    | 3127274 G   | 0.0      | 0.26    | 0.13  | 0.044    | 6.16E-09 |
| AP0A4          | rs4937773  | Tyrosinase (Eq. Transformation)                  | 11   | 11660334 T  | 0.06     | -0.06   | -0.12 | 0.010    | 6.16E-09 |
| DOCK7          | rs10215025 | Tyrosinase (Eq. Transformation)                  | 1    | 6305904 C   | 0.08     | 0.04    | 0.09  | 0.007    | 6.70E-09 |
| DOCK7          | rs4847860  | Tyrosinase (Eq. Transformation)                  | 1    | 6305904 C   | 0.08     | 0.04    | 0.09  | 0.007    | 6.86E-09 |
| C9ORF2         | rs4927511  | White Blood Cell Count                           | 6    | 3168194 A   | 0.0      | 0.26    | 0.13  | 0.044    | 6.86E-09 |
| TGFB2          | rs12153172 | Glucuronidase (Eq. Transformation)               | 10   | 11448990 G  | 0.71     | -0.02   | -0.09 | 0.003    | 6.96E-09 |
| DOCK7          | rs10285103 | Tyrosinase (Eq. Transformation)                  | 1    | 6313196 A   | 0.08     | 0.04    | 0.09  | 0.007    | 7.12E-09 |
| NA             | rs445925   | Tyrosinase (Eq. Transformation)                  | 19   | 4545640 G   | 0.08     | -0.06   | -0.13 | 0.011    | 7.26E-09 |
| DOCK7          | rs1278864  | Tyrosinase (Eq. Transformation)                  | 1    | 6312017 A   | 0.08     | 0.04    | 0.09  | 0.007    | 7.63E-09 |
| CELSD3         | rs1073983  | Cholesteryl                                      | 8    | 30984880 C  | 0.02     | 1.08    | 0.11  | 0.011    | 7.84E-09 |
| USP1           | rs10883123 | Hemoglobin A2c                                   | 6    | 4263695 C   | 0.73     | -0.13   | -0.13 | 0.003    | 8.06E-09 |
| NA             | rs4938883  | High Density Lipoprotein (Eq. Transformation)    | 18   | 47487214 C  | 0.03     | 0.03    | 0.10  | 0.005    | 8.66E-09 |
| USP1           | rs10883123 | Tyrosinase (Eq. Transformation)                  | 6    | 4263695 C   | 0.68     | 0.04    | 0.09  | 0.007    | 9.00E-09 |
| NA             | rs4745568  | Plasmin                                          | 0.79 | -0.29       | -0.08    | 0.011   | 0.002 | 0.00     | 9.02E-09 |
| TRAF8          | rs11375715 | White Blood Cell Count                           | 6    | 3158395 A   | 0.0      | 0.26    | 0.13  | 0.044    | 9.08E-09 |
| POEHB          | rs5681052  | Thyroid Stimulating Hormone (Eq. Transformation) | 5    | 7624242 T   | 0.11     | -0.03   | -0.08 | 0.006    | 9.30E-09 |
| C2             | rs1037847  | White Blood Cell Count                           | 6    | 31878420 G  | 0.0      | 0.25    | 0.13  | 0.044    | 9.10E-09 |
| NA             | rs1201018  | White Blood Cell Count                           | 6    | 3170366 C   | 0.0      | 0.25    | 0.13  | 0.044    | 9.25E-09 |
| DOCK7          | rs10215025 | Tyrosinase (Eq. Transformation)                  | 1    | 6305904 C   | 0.08     | 0.04    | 0.09  | 0.007    | 9.28E-09 |
| LPL            | rs44       | High Density Lipoprotein (Eq. Transformation)    | 8    | 1882107 C   | 0.0      | -0.04   | -0.14 | 0.006    | 9.42E-09 |
| PCSK9          | rs4481268  | Low Density Lipoprotein                          | 3    | 5510249 C   | 0.08     | 10.41   | 0.31  | 1.87     | 1.00E-09 |
| C2             | rs407139   | White Blood Cell Count                           | 6    | 3182484 A   | 0.0      | 0.25    | 0.13  | 0.044    | 1.02E-09 |
| SKI            | rs12151452 | Tyrosinase (Eq. Transformation)                  | 11   | 11681104 C  | 0.08     | -0.06   | -0.13 | 0.010    | 1.03E-09 |
| TMS62          | rs4414713  | Tyrosinase (Eq. Transformation)                  | 1    | 11681104 C  | 0.02     | 0.07    | 0.16  | 0.013    | 1.05E-09 |
| NA             | rs12151452 | Tyrosinase (Eq. Transformation)                  | 11   | 11681104 A  | 0.0      | 0.04    | 0.09  | 0.007    | 1.06E-09 |
| NA             | rs4414713  | High Density Lipoprotein (Eq. Transformation)    | 7    | 7584005 A   | 0.72     | 0.04    | 0.09  | 0.007    | 1.06E-09 |
| LPL            | rs12151452 | Tyrosinase (Eq. Transformation)                  | 11   | 11681104 T  | 0.0      | 0.03    | 0.10  | 0.005    | 1.10E-09 |
| FAH3DA         | rs1802572  | Plasmin                                          | 12   | 11180206 G  | 0.72     | 0.07    | 0.15  | 0.012    | 1.10E-09 |
| OPN            | rs202827   | Thyroglobulin Antibody                           | 2    | 16281708 G  | 0.09     | -0.01   | -1.28 | 7.87     | 1.20E-09 |
| PNB2           | rs2272385  | High Density Lipoprotein (Eq. Transformation)    | 9    | 31458154 A  | 0.0      | 0.0     | 0.0   | 0.005    | 1.24E-09 |
| AP0A4          | rs1171782  | White Blood Cell Count                           | 6    | 3162020 T   | 0.0      | 0.25    | 0.13  | 0.044    | 1.29E-09 |
| AKAI           | rs8847300  | High Density Lipoprotein (Eq. Transformation)    | 9    | 30748990 C  | 0.08     | 0.03    | 0.12  | 0.006    | 1.29E-09 |
| CFB            | rs1270942  | White Blood Cell Count                           | 6    | 3161880 A   | 0.0      | 0.25    | 0.13  | 0.044    | 1.30E-09 |
| USP1           | rs10215887 | Tyrosinase (Eq. Transformation)                  | 1    | 6297661 C   | 0.0608   | 0.08    | 0.007 | 1.10E-09 |          |
| SK1            | rs2002614  | Tyrosinase (Eq. Transformation)                  | 11   | 116811742 T | 0.080324 | -0.0867 | -0.13 | 0.01     | 1.32E-09 |
| DOCK7          | rs11288004 | Tyrosinase (Eq. Transformation)                  | 1    | 6316458 G   | 0.080324 | 0.0408  | 0.08  | 0.007    | 1.33E-09 |



Bonferoni corrected SNPs in ICD-9 code PheWAS

| Gene             | SNP        | ICD-9 Code | ICD-9 Code Desc           | CHR | BP        | Allele | Allele Frequency | Cases | Controls | Beta  | SE   | P-Value  | NHGRI GWAS Trait                                                                                                                                                                                                             |
|------------------|------------|------------|---------------------------|-----|-----------|--------|------------------|-------|----------|-------|------|----------|------------------------------------------------------------------------------------------------------------------------------------------------------------------------------------------------------------------------------|
| TCF7L2           | rs12243326 | 250        | Type II Diabetes Mellitus | 10  | 114788815 | T      | 0.72             | 3485  | 8225     | -0.25 | 0.03 | 6.25E-13 | Two-hour glucose challenge                                                                                                                                                                                                   |
| CFB              | rs1270942  | 250.01     | Type I Diabetes Mellitus  | 6   | 31918860  | A      | 0.91             | 347   | 11496    | -0.61 | 0.11 | 1.32E-07 |                                                                                                                                                                                                                              |
| VWA7             | rs3115671  | 250.01     | Type I Diabetes Mellitus  | 6   | 31734345  | G      | 0.91             | 347   | 11494    | -0.59 | 0.11 | 2.27E-07 |                                                                                                                                                                                                                              |
| MSHS-SAPCD1,MSHS | rs3117574  | 250.01     | Type I Diabetes Mellitus  | 6   | 31725230  | G      | 0.91             | 346   | 11494    | -0.59 | 0.11 | 2.29E-07 |                                                                                                                                                                                                                              |
| MSHS-SAPCD1,MSHS | rs3117577  | 250.01     | Type I Diabetes Mellitus  | 6   | 31727474  | A      | 0.91             | 347   | 11496    | -0.59 | 0.11 | 2.21E-07 |                                                                                                                                                                                                                              |
| APOM             | rs3117582  | 250.01     | Type I Diabetes Mellitus  | 6   | 31620520  | T      | 0.91             | 347   | 11496    | -0.58 | 0.11 | 3.34E-07 | Lung cancer,Lung adenocarcinoma                                                                                                                                                                                              |
| MSHS-SAPCD1,MSHS | rs3131379  | 250.01     | Type I Diabetes Mellitus  | 6   | 31721033  | G      | 0.91             | 347   | 11494    | -0.59 | 0.11 | 2.56E-07 | Systemic lupus erythematosus                                                                                                                                                                                                 |
| CLIC1            | rs3131383  | 250.01     | Type I Diabetes Mellitus  | 6   | 31704294  | G      | 0.91             | 347   | 11492    | -0.59 | 0.11 | 2.85E-07 |                                                                                                                                                                                                                              |
|                  | rs445925   | 272.4      | Hyperlipidemia            | 19  | 45415640  | G      | 0.89             | 5965  | 4581     | 0.34  | 0.05 | 1.51E-11 | Cardiovascular disease risk factors,Apolipoprotein levels,Carotid intima media thickness,Lipoprotein-associated phospholipase A2 activity and mass,Metabolite levels                                                         |
| TCF7L2           | rs4506565  | 250        | Type II Diabetes Mellitus | 10  | 114756041 | A      | 0.68             | 3483  | 8223     | -0.29 | 0.03 | 1.03E-18 | Fasting glucose-related traits,Type 2 diabetes                                                                                                                                                                               |
| C2               | rs497309   | 250.01     | Type I Diabetes Mellitus  | 6   | 31892484  | A      | 0.91             | 347   | 11493    | -0.59 | 0.11 | 2.65E-07 |                                                                                                                                                                                                                              |
| C2               | rs558702   | 250.01     | Type I Diabetes Mellitus  | 6   | 31870326  | G      | 0.91             | 347   | 11494    | -0.61 | 0.11 | 1.14E-07 |                                                                                                                                                                                                                              |
|                  | rs602633   | 272.4      | Hyperlipidemia            | 1   | 109821511 | G      | 0.79             | 5957  | 4571     | 0.18  | 0.04 | 4.55E-06 |                                                                                                                                                                                                                              |
| LDLR             | rs6511720  | 272.4      | Hyperlipidemia            | 19  | 11202306  | G      | 0.88             | 5963  | 4579     | 0.28  | 0.05 | 1.91E-08 | LDL cholesterol,Cardiovascular disease risk factors,Cholesterol, total,Metabolite levels,Carotid intima media thickness,Lipoprotein-associated phospholipase A2 activity and mass                                            |
| TCF7L2           | rs7901695  | 250        | Type II Diabetes Mellitus | 10  | 114754088 | T      | 0.69             | 3485  | 8225     | -0.28 | 0.03 | 5.01E-17 | Type 2 diabetes,Coronary heart disease                                                                                                                                                                                       |
| TCF7L2           | rs7903146  | 250        | Type II Diabetes Mellitus | 10  | 114758349 | C      | 0.70             | 3485  | 8225     | -0.29 | 0.03 | 1.53E-17 | Type 2 diabetes,Fasting glucose-related traits (interaction with BMI),Glycated hemoglobin levels,Metabolic syndrome,Type 2 diabetes and other traits,Fasting insulin-related traits (interaction with BMI),Proinsulin levels |
|                  | rs965513   | 244.9      | Hypothyroidism            | 9   | 100556109 | G      | 0.66             | 1750  | 9801     | 0.22  | 0.04 | 8.03E-08 | Thyroid cancer                                                                                                                                                                                                               |
| VWA7             | rs3101017  | 250.01     | Type I Diabetes Mellitus  | 6   | 31733466  | T      | 0.91             | 347   | 11496    | -0.59 | 0.11 | 2.54E-07 |                                                                                                                                                                                                                              |
| PDE8B            | rs10037599 | 244.9      | Hypothyroidism            | 5   | 76541325  | A      | 0.60             | 1750  | 9790     | -0.19 | 0.04 | 7.71E-07 |                                                                                                                                                                                                                              |
|                  | rs10759944 | 244.9      | Hypothyroidism            | 9   | 100556972 | G      | 0.66             | 1751  | 9801     | 0.22  | 0.04 | 9.48E-08 |                                                                                                                                                                                                                              |
| TNXB             | rs1150753  | 250.01     | Type I Diabetes Mellitus  | 6   | 32059867  | A      | 0.91             | 347   | 11481    | -0.65 | 0.11 | 2.56E-08 |                                                                                                                                                                                                                              |
| TCF7L2           | rs12255372 | 250        | Type II Diabetes Mellitus | 10  | 114808902 | G      | 0.71             | 3485  | 8225     | -0.25 | 0.03 | 2.99E-13 |                                                                                                                                                                                                                              |
|                  | rs1269852  | 250.01     | Type I Diabetes Mellitus  | 6   | 32080191  | G      | 0.91             | 347   | 11496    | -0.66 | 0.11 | 1.19E-08 |                                                                                                                                                                                                                              |
| PDE8B            | rs1382879  | 244.9      | Hypothyroidism            | 5   | 76521868  | T      | 0.60             | 1747  | 9788     | -0.18 | 0.04 | 4.24E-06 |                                                                                                                                                                                                                              |
|                  | rs1443438  | 244.9      | Hypothyroidism            | 9   | 100550028 | C      | 0.66             | 1751  | 9801     | 0.22  | 0.04 | 6.67E-08 | Obesity-related traits                                                                                                                                                                                                       |
|                  | rs3101018  | 250.01     | Type I Diabetes Mellitus  | 6   | 31705864  | C      | 0.91             | 347   | 11496    | -0.59 | 0.11 | 2.45E-07 |                                                                                                                                                                                                                              |
| MSHS-SAPCD1,MSHS | rs3130484  | 250.01     | Type I Diabetes Mellitus  | 6   | 31715882  | T      | 0.91             | 347   | 11496    | -0.59 | 0.11 | 2.17E-07 |                                                                                                                                                                                                                              |
| MSHS-SAPCD1,MSHS | rs3131378  | 250.01     | Type I Diabetes Mellitus  | 6   | 31725285  | A      | 0.91             | 347   | 11496    | -0.59 | 0.11 | 2.54E-07 |                                                                                                                                                                                                                              |
| MSHS-SAPCD1,MSHS | rs3132445  | 250.01     | Type I Diabetes Mellitus  | 6   | 31712196  | G      | 0.91             | 347   | 11496    | -0.59 | 0.11 | 2.58E-07 |                                                                                                                                                                                                                              |
| TCF7L2           | rs4074720  | 250        | Type II Diabetes Mellitus | 10  | 114748497 | C      | 0.53             | 3484  | 8225     | -0.19 | 0.03 | 3.58E-10 |                                                                                                                                                                                                                              |
| TCF7L2           | rs4132670  | 250        | Type II Diabetes Mellitus | 10  | 114767771 | G      | 0.68             | 3481  | 8222     | -0.27 | 0.03 | 3.16E-16 |                                                                                                                                                                                                                              |
| C2               | rs519417   | 250.01     | Type I Diabetes Mellitus  | 6   | 31878433  | G      | 0.91             | 347   | 11492    | -0.59 | 0.11 | 3.60E-07 |                                                                                                                                                                                                                              |
| TCF7L2           | rs6585196  | 250        | Type II Diabetes Mellitus | 10  | 114737050 | T      | 0.63             | 3479  | 8202     | 0.15  | 0.03 | 3.60E-06 |                                                                                                                                                                                                                              |
| TCF7L2           | rs6585201  | 250        | Type II Diabetes Mellitus | 10  | 114768783 | G      | 0.54             | 3484  | 8223     | -0.18 | 0.03 | 4.24E-09 |                                                                                                                                                                                                                              |
| CELSR2           | rs660240   | 272.4      | Hyperlipidemia            | 1   | 109817838 | C      | 0.79             | 5965  | 4581     | 0.19  | 0.04 | 1.43E-06 | LDL cholesterol,Cardiovascular disease risk factors                                                                                                                                                                          |
|                  | rs7850258  | 244.9      | Hypothyroidism            | 9   | 100549013 | G      | 0.66             | 1751  | 9801     | 0.22  | 0.04 | 5.85E-08 | Hypothyroidism                                                                                                                                                                                                               |
| TCF7L2           | rs7901275  | 250        | Type II Diabetes Mellitus | 10  | 114732906 | A      | 0.54             | 3485  | 8226     | -0.15 | 0.03 | 2.24E-06 |                                                                                                                                                                                                                              |
| CSNK2B           | rs9267531  | 250.01     | Type I Diabetes Mellitus  | 6   | 31636742  | A      | 0.91             | 347   | 11496    | -0.59 | 0.11 | 2.48E-07 |                                                                                                                                                                                                                              |
|                  | rs9273363  | 250.01     | Type I Diabetes Mellitus  | 6   | 32626272  | C      | 0.74             | 347   | 11489    | -0.85 | 0.08 | 4.40E-26 |                                                                                                                                                                                                                              |

## Number of Cases for each Clinical Lab Measure

| Clinical Lab Measure                      | Number of Cases | Number of SNPs passing Bonferoni threshold |
|-------------------------------------------|-----------------|--------------------------------------------|
| ALANINEAMINOTRANSFERASE_Log_Transform     | 11007           | 5                                          |
| ALBUMIN-BLOOD                             | 10804           | 0                                          |
| ASPARTATEAMINOTRANSFERASE_Log_Transform   | 10838           | 12                                         |
| BICARBONATE(HCO3)                         | 937             | 0                                          |
| CARBONDIOXIDE(CO2)                        | 11570           | 0                                          |
| CHOLESTEROL-BLOOD                         | 9295            | 12                                         |
| CREATININE-BLOOD-MASS_VOLUME              | 5215            | 0                                          |
| FREE_T3                                   | 2152            | 0                                          |
| FREE_T4_Log_Transformed                   | 3562            | 0                                          |
| GLUCOSE_Log_Transformed                   | 8899            | 10                                         |
| HEMOGLOBINA1C                             | 6501            | 5                                          |
| HIGHDENSITYLIPOPROTEIN_Log_Transformed    | 9330            | 66                                         |
| INSULIN-LIKEGROWTHFACTOR1_Log_Transformed | 206             | 0                                          |
| LOWDENSITYLIPOPROTEIN                     | 9237            | 14                                         |
| PLATELET-BLOOD-COUNT                      | 11545           | 25                                         |
| PROTEIN-URINE_Log_Transformed             | 2034            | 0                                          |
| RBC-COUNT-BLOOD                           | 11599           | 20                                         |
| THYROGLOBULINANTIBODY                     | 819             | 2                                          |
| THYROIDPEROXIDASEANTIBODY_Log_Transformed | 943             | 0                                          |
| THYROIDSTIMULATINGHORMONE_Log_Transformed | 9531            | 25                                         |
| TRIGLYCERIDES-BLOOD_Log_Transform         | 9330            | 112                                        |
| WBC-COUNT-BLOOD                           | 11597           | 39                                         |

### Case-Control number based on phenotype information for each ICD-9 code used in analysis

| ICD-9 Code | ICD-9 Description                                             | Cases | Controls | Number of SNPs Passing Bonferroni Threshold |
|------------|---------------------------------------------------------------|-------|----------|---------------------------------------------|
| 110.1      | Dermatophytosis Of Nail                                       |       | 338      | 11873                                       |
| 112.1      | Candidal Vulvovaginitis                                       |       | 220      | 11991                                       |
| 185        | Malignant Neoplasm Of Prostate                                |       | 307      | 11904                                       |
| 211.3      | Benign Neoplasm Of Colon                                      |       | 444      | 11767                                       |
| 238.2      | Neoplasm Of Uncertain Behavior Of Skin                        |       | 710      | 11501                                       |
| 244.9      | Hypothyroidism Nos                                            |       | 1753     | 10458                                       |
| 250        | Type Ii Diabetes Mellitus [Non-Insulin Dependent Type] [N]    |       | 3486     | 8725                                        |
| 250.01     | Type I Diabetes Mellitus [Insulin Dependent Type] [Iddim] [I] |       | 348      | 11863                                       |
| 250.4      | Diabetes Mellitus Type Ii [Non-Insulin Dependent Type] [N]    |       | 540      | 11671                                       |
| 250.6      | Diabetes Mellitus Type Ii [Non-Insulin Dependent Type] [N]    |       | 351      | 11860                                       |
| 268.9      | Vitamin D Deficiency Nos                                      |       | 1556     | 10655                                       |
| 272.1      | Pure Hyperglycemia                                            |       | 207      | 12004                                       |
| 272.2      | Mixed Hyperlipidemia                                          |       | 998      | 11213                                       |
| 272.4      | Other And Unspecified Hyperlipidemia                          |       | 5968     | 6243                                        |
| 274.9      | Gout Nos                                                      |       | 431      | 11780                                       |
| 276.8      | Hypopotassemia                                                |       | 222      | 11989                                       |
| 278        | Obesity Nos                                                   |       | 1560     | 10651                                       |
| 278.01     | Morbid Obesity                                                |       | 1845     | 10366                                       |
| 280.9      | Iron Deficiency Anemia, Unspecified                           |       | 366      | 11845                                       |
| 285.9      | Anemia Nos                                                    |       | 895      | 11316                                       |
| 300        | Anxiety State Nos                                             |       | 1327     | 10884                                       |
| 300.01     | Panic Disorder Without Agoraphobia                            |       | 202      | 12009                                       |
| 300.02     | Generalized Anxiety Disorder                                  |       | 663      | 11548                                       |
| 305.1      | Tobacco Use Disorder                                          |       | 1656     | 10555                                       |
| 309        | Adjustment Disorder With Depressed Mood                       |       | 785      | 11426                                       |
| 311        | Depressive Disorder Nec                                       |       | 2490     | 9721                                        |
| 327.23     | Obstructive Sleep Apnea                                       |       | 891      | 11320                                       |
| 333.94     | Restless Legs Syndrome                                        |       | 269      | 11942                                       |
| 346        | Migraine With Aura, Without Mention Of Intractable Migr:      |       | 248      | 11963                                       |
| 346.1      | Migraine Without Aura, Without Mention Of Intractable Iv      |       | 250      | 11961                                       |
| 346.9      | Migraine, Unspecified, Without Mention Of Intractable Ml      |       | 367      | 11844                                       |
| 354        | Carpal Tunnel Syndrome                                        |       | 595      | 11616                                       |
| 357.2      | Polynuropathy In Diabetes                                     |       | 335      | 11876                                       |
| 365        | Preglaucoma, Unspecified                                      |       | 358      | 11853                                       |
| 365.11     | Primary Open Angle Glaucoma                                   |       | 261      | 11950                                       |
| 366.1      | Senile Cataract, Unspecified                                  |       | 237      | 11974                                       |
| 366.15     | Cortical Senile Cataract                                      |       | 394      | 11817                                       |
| 366.16     | Senile Nuclear Cataract                                       |       | 976      | 11235                                       |
| 366.52     | Other After-Cataract, Not Obscuring Vision                    |       | 727      | 11484                                       |
| 367.4      | Presbyopia                                                    |       | 1014     | 11197                                       |
| 367.9      | Unspecified Disorder Of Refraction And Accommodation          |       | 1698     | 10513                                       |
| 373        | Blepharitis Nos                                               |       | 214      | 11997                                       |
| 375.15     | Tear Film Insuffic Nos                                        |       | 310      | 11901                                       |
| 379.21     | Vitreous Degeneration                                         |       | 245      | 11966                                       |
| 380.4      | Impacted Cerumen                                              |       | 413      | 11798                                       |
| 389.1      | Sensorineural Hearing Loss, Unspecified                       |       | 263      | 11948                                       |
| 389.9      | Hearing Loss Nos                                              |       | 259      | 11952                                       |
| 401.9      | Hypertension Nos                                              |       | 6091     | 6120                                        |
| 402.9      | Unspecified Hypertensive Heart Disease Without Heart Fai      |       | 324      | 11887                                       |
| 412        | Old Myocardial Infarction                                     |       | 337      | 11874                                       |
| 413.9      | Other And Unspecified Angina Pectoris                         |       | 383      | 11828                                       |
| 414        | Coronary Atherosclerosis Of Unspecified Type Of Vessel, N     |       | 1594     | 10617                                       |
| 414.01     | Coronary Atherosclerosis Of Native Coronary Artery            |       | 999      | 11212                                       |
| 414.8      | Other Specified Forms Of Chronic Ischemic Heart Disease       |       | 316      | 11895                                       |
| 414.9      | Chronic Ischemic Heart Disease, Unspecified                   |       | 575      | 11636                                       |
| 415.19     | Other Pulmonary Embolism And Infarction                       |       | 217      | 11994                                       |
| 424        | Mitral Valve Disorder                                         |       | 353      | 11858                                       |
| 424.1      | Aortic Valve Disorder                                         |       | 591      | 11620                                       |
| 427.31     | Atrial Fibrillation                                           |       | 1041     | 11170                                       |
| 428        | Chf Nos                                                       |       | 299      | 11912                                       |

|        |                                                             |      |       |    |
|--------|-------------------------------------------------------------|------|-------|----|
| 428.2  | Systolic Heart Failure, Unspecified                         | 353  | 11858 | 0  |
| 428.9  | Heart Failure Nos                                           | 417  | 11794 | 0  |
| 429.2  | Ascvd                                                       | 401  | 11810 | 0  |
| 433.1  | Occlusion And Stenosis Of Carotid Artery, Without Mention   | 646  | 11565 | 0  |
| 435.9  | Unspecified Transient Cerebral Ischemia                     | 225  | 11986 | 0  |
| 436    | Acute, But Ill-Defined Cerebrovascular Disease              | 229  | 11982 | 0  |
| 437    | Cerebral Atherosclerosis                                    | 277  | 11934 | 0  |
| 440.21 | Atherosclerosis Of Native Arteries Of The Extremities With  | 399  | 11812 | 0  |
| 441.4  | Abdominal Aortic Aneurysm Without Mention Of Rupture        | 512  | 11699 | 0  |
| 443.9  | Peripheral Vascular Disease, Unspecified                    | 648  | 11563 | 0  |
| 459.81 | Venous Insufficiency Nos                                    | 212  | 11999 | 0  |
| 461.9  | Acute Sinusitis Nos                                         | 2310 | 9901  | 0  |
| 462    | Acute Pharyngitis                                           | 621  | 11590 | 0  |
| 465.9  | Acute Upper Respiratory Infections Of Unspecified Site      | 696  | 11515 | 0  |
| 466    | Acute Bronchitis                                            | 1477 | 10734 | 0  |
| 472    | Chronic Rhinitis                                            | 411  | 11800 | 0  |
| 477.8  | Allergic Rhinitis Due To Other Allergen                     | 392  | 11819 | 0  |
| 477.9  | Allergic Rhinitis Nos                                       | 1095 | 11116 | 0  |
| 491.21 | Obstructive Chronic Bronchitis With (Acute) Exacerbation    | 282  | 11929 | 0  |
| 492.8  | Other Emphysema                                             | 271  | 11940 | 0  |
| 493.9  | Asthma, Unspecified Type, Without Mention Of Status Asti    | 1269 | 10942 | 0  |
| 496    | Chronic Airway Obstruction, Not Elsewhere Classified        | 1022 | 11189 | 0  |
| 530.11 | Reflux Esophagitis                                          | 378  | 11833 | 0  |
| 530.81 | Esophageal Reflux                                           | 2919 | 9292  | 0  |
| 564.1  | Irritable Bowel Syndrome                                    | 354  | 11857 | 0  |
| 564.2  | Postgastric Surgery Syndromes                               | 385  | 11826 | 0  |
| 579.3  | Other And Unspecified Postsurgical Nonabsorption            | 594  | 11617 | 0  |
| 585.3  | Chronic Kidney Disease, Stage Iii (Moderate)                | 1417 | 10794 | 0  |
| 585.4  | Chronic Kidney Disease, Stage Iv (Severe)                   | 271  | 11940 | 0  |
| 585.9  | Chronic Kidney Disease, Unspecified                         | 228  | 11983 | 0  |
| 592    | Calculus Of Kidney                                          | 393  | 11818 | 0  |
| 599    | Urinary Tract Infection, Site Not Specified                 | 621  | 11590 | 0  |
| 600    | Hypertrophy (Benign) Of Prostate Without Urinary Obstruc    | 425  | 11786 | 0  |
| 600.01 | Hypertrophy (Benign) Of Prostate With Urinary Obstructio    | 371  | 11840 | 0  |
| 607.84 | Impotence Of Organic Origin                                 | 547  | 11664 | 0  |
| 616.1  | Vaginitis Nos                                               | 228  | 11983 | 0  |
| 625.6  | Stress Incontinence, Female                                 | 248  | 11963 | 0  |
| 626.2  | Excessive Or Frequent Menstruation                          | 305  | 11906 | 0  |
| 627.3  | Postmenopausal Atrophic Vaginitis                           | 227  | 11984 | 0  |
| 682.6  | Cellulitis And Abscess Of Leg, Except Foot                  | 254  | 11957 | 0  |
| 692.9  | Contact Dermatitis And Other Eczema, Unspecified Cause      | 1403 | 10808 | 0  |
| 695.3  | Rosacea                                                     | 220  | 11991 | 0  |
| 696.1  | Other Psoriasis And Similar Disorders Excluding Psoriatic A | 218  | 11993 | 0  |
| 702    | Actinic Keratosis                                           | 718  | 11493 | 0  |
| 702.19 | Other Seborrheic Keratosis                                  | 261  | 11950 | 0  |
| 706.1  | Other Acne                                                  | 225  | 11986 | 0  |
| 706.2  | Sebaceous Cyst                                              | 210  | 12001 | 0  |
| 714    | Rheumatoid Arthritis                                        | 429  | 11782 | 26 |
| 715    | Osteoarthritis, Generalized, Involving Unspecified Site     | 915  | 11296 | 0  |
| 715.16 | Osteoarthritis, Localized, Primary, Involving Lower Leg     | 418  | 11793 | 0  |
| 715.9  | Osteoarthritis, Unspecified Whether Generalized Or Local    | 265  | 11946 | 0  |
| 715.96 | Osteoarthritis, Unspecified Whether Generalized Or Local    | 794  | 11417 | 0  |
| 719.41 | Pain In Joint Involving Shoulder Region                     | 817  | 11394 | 0  |
| 719.45 | Pain In Joint Involving Pelvic Region And Thigh             | 341  | 11870 | 0  |
| 719.46 | Pain In Joint Involving Lower Leg                           | 1260 | 10951 | 0  |
| 719.47 | Pain In Joint Involving Ankle And Foot                      | 293  | 11918 | 0  |
| 721.3  | Lumbosacral Spondylosis Without Myelopathy                  | 242  | 11969 | 0  |
| 722    | Displacement Of Cervical Intervertebral Disc Without Myel   | 293  | 11918 | 0  |
| 722.1  | Displacement Of Lumbar Intervertebral Disc Without Myel     | 616  | 11595 | 0  |
| 722.52 | Degeneration Of Lumbar Or Lumbosacral Intervertebral Di     | 431  | 11780 | 0  |
| 722.93 | Other And Unspecified Disc Disorder Of Lumbar Region        | 244  | 11967 | 0  |
| 723.1  | Cervicalgia                                                 | 825  | 11386 | 0  |
| 724.02 | Spinal Stenosis Of Lumbar Region                            | 520  | 11691 | 0  |

|                                                                         |      |       |   |
|-------------------------------------------------------------------------|------|-------|---|
| 724.2 Lumbago                                                           | 996  | 11215 | 0 |
| 724.3 Sciatica                                                          | 455  | 11756 | 0 |
| 724.4 Thoracic Or Lumbosacral Neuritis Or Radiculitis, Unspecific       | 656  | 11555 | 0 |
| 724.5 Backache Nos                                                      | 1579 | 10632 | 0 |
| 726.1 Disorders Of Bursae And Tendons In Shoulder Region, Unsi          | 388  | 11823 | 0 |
| 726.5 Enthesopathy Of Hip Region                                        | 287  | 11924 | 0 |
| 727.03 Trigger Finger                                                   | 250  | 11961 | 0 |
| 728.71 Plantar Fascial Fibromatosis                                     | 228  | 11983 | 0 |
| 728.85 Spasm Of Muscle                                                  | 207  | 12004 | 0 |
| 729.1 Myalgia And Myositis Nos                                          | 771  | 11440 | 0 |
| 729.5 Pain In Limb                                                      | 1508 | 10703 | 0 |
| 733 Osteoporosis Nos                                                    | 959  | 11252 | 0 |
| 733.09 Other Osteoporosis                                               | 295  | 11916 | 0 |
| 780.2 Syncope And Collapse                                              | 240  | 11971 | 0 |
| 780.4 Dizziness And Giddiness                                           | 596  | 11615 | 0 |
| 780.52 Insomnia Nos                                                     | 665  | 11546 | 0 |
| 780.57 Unspecified Sleep Apnea                                          | 679  | 11532 | 0 |
| 780.79 Other Malaise And Fatigue                                        | 1125 | 11086 | 0 |
| 781.2 Abnormality Of Gait                                               | 211  | 12000 | 0 |
| 782 Disturbance Of Skin Sensation                                       | 298  | 11913 | 0 |
| 782.3 Edema                                                             | 1170 | 11041 | 0 |
| 784 Headache                                                            | 965  | 11246 | 0 |
| 785.1 Palpitations                                                      | 351  | 11860 | 0 |
| 786.05 Shortness Of Breath                                              | 483  | 11728 | 0 |
| 786.09 Other Dyspnea And Respiratory Abnormality                        | 627  | 11584 | 0 |
| 786.2 Cough                                                             | 1099 | 11112 | 0 |
| 786.5 Chest Pain Nos                                                    | 944  | 11267 | 0 |
| 786.59 Chest Pain Nec                                                   | 414  | 11797 | 0 |
| 787.02 Nausea Alone                                                     | 234  | 11977 | 0 |
| 787.91 Diarrhea                                                         | 487  | 11724 | 0 |
| 788.1 Dysuria                                                           | 532  | 11679 | 0 |
| 788.3 Urinary Incontinence Nos                                          | 220  | 11991 | 0 |
| 788.41 Urinary Frequency                                                | 301  | 11910 | 0 |
| 788.43 Nocturia                                                         | 269  | 11942 | 0 |
| 789 Abdominal Pain, Unspecified Site                                    | 491  | 11720 | 0 |
| 789.06 Abdominal Pain, Epigastric                                       | 242  | 11969 | 0 |
| 789.07 Abdominal Pain, Generalized                                      | 220  | 11991 | 0 |
| 790.21 Impaired Fasting Glucose                                         | 216  | 11995 | 0 |
| 790.6 Other Abnormal Blood Chemistry                                    | 248  | 11963 | 0 |
| 790.93 Elevated Prostate Specific Antigen [Psa]                         | 371  | 11840 | 0 |
| 791 Proteinuria                                                         | 269  | 11942 | 0 |
| 796.2 Elevated Blood Pressure Reading Without Diagnosis Of Hypertension | 205  | 12006 | 0 |

### Alanine Amino Tranferase (Log Transform)

Genomic Inflation Factor is 1.05177536762139

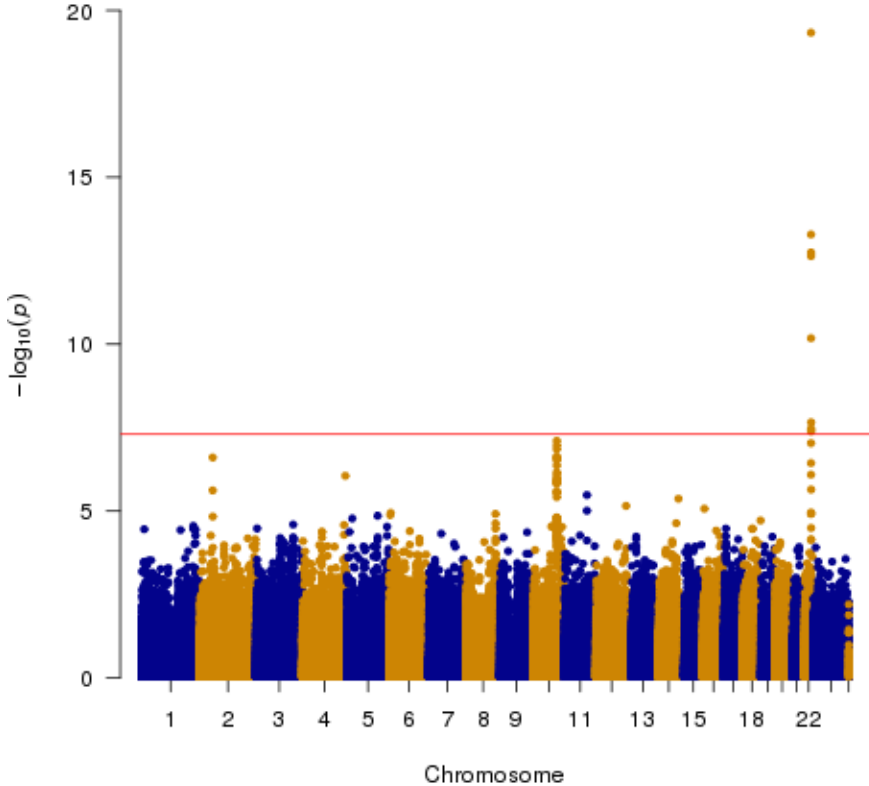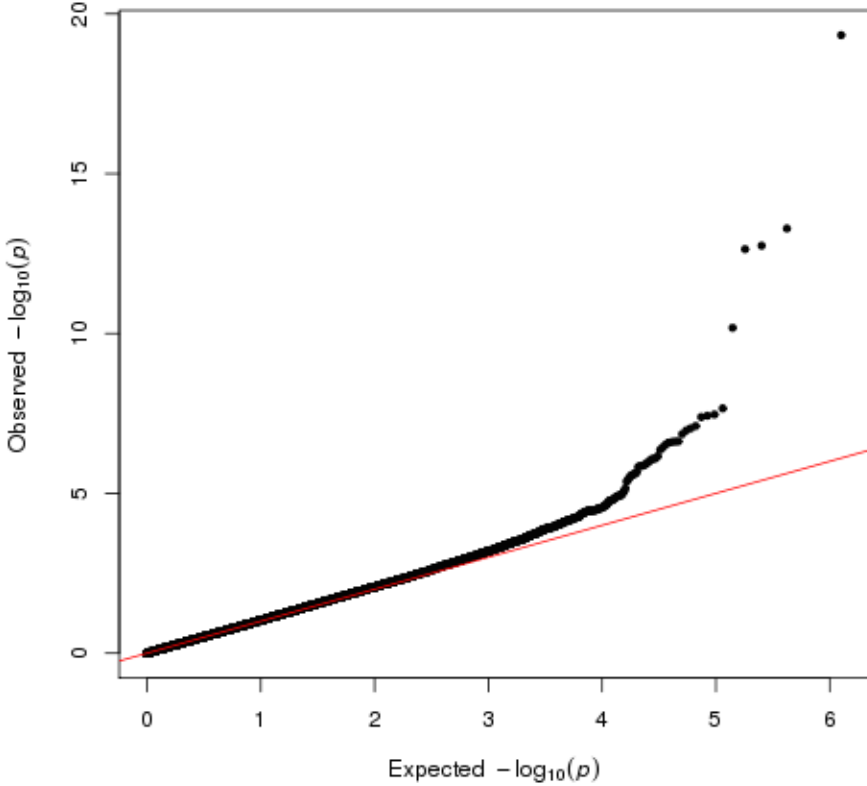

# Albumin

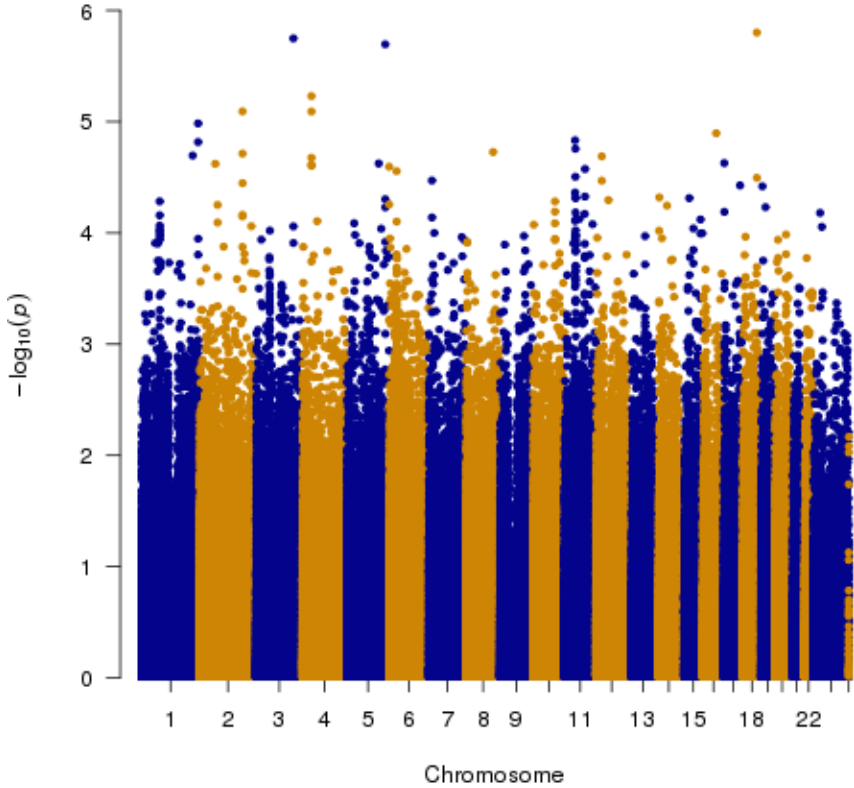

Genomic Inflation Factor is 1.05642617632916

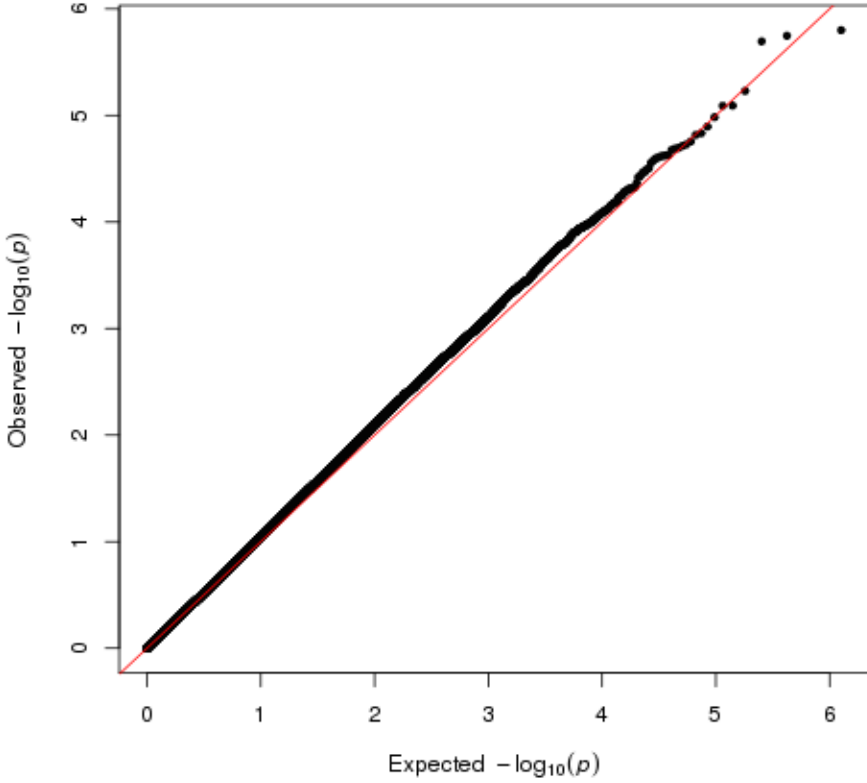

## Aspartate Amino Transferase

Genomic Inflation Factor is 1.04834340569528

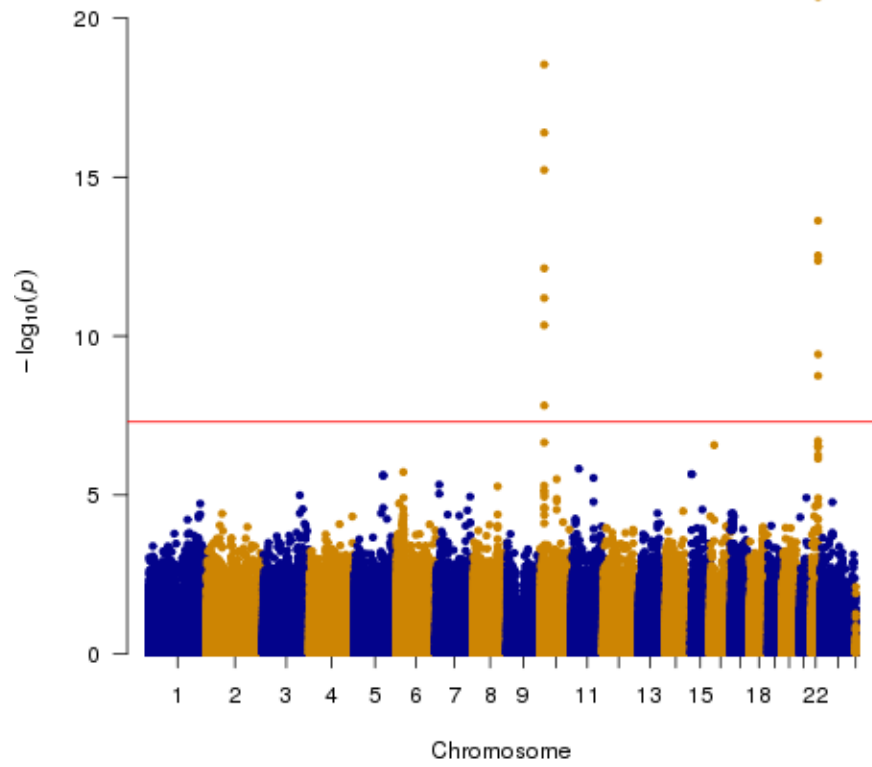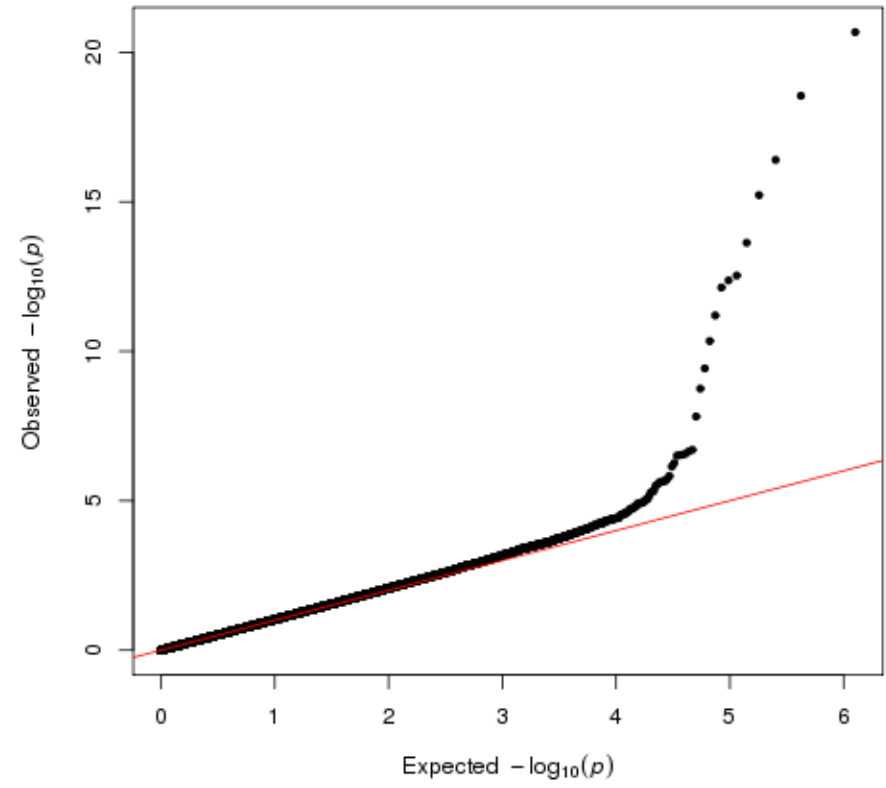



### Carbon dioxide

Genomic Inflation Factor is 1.03191172663572

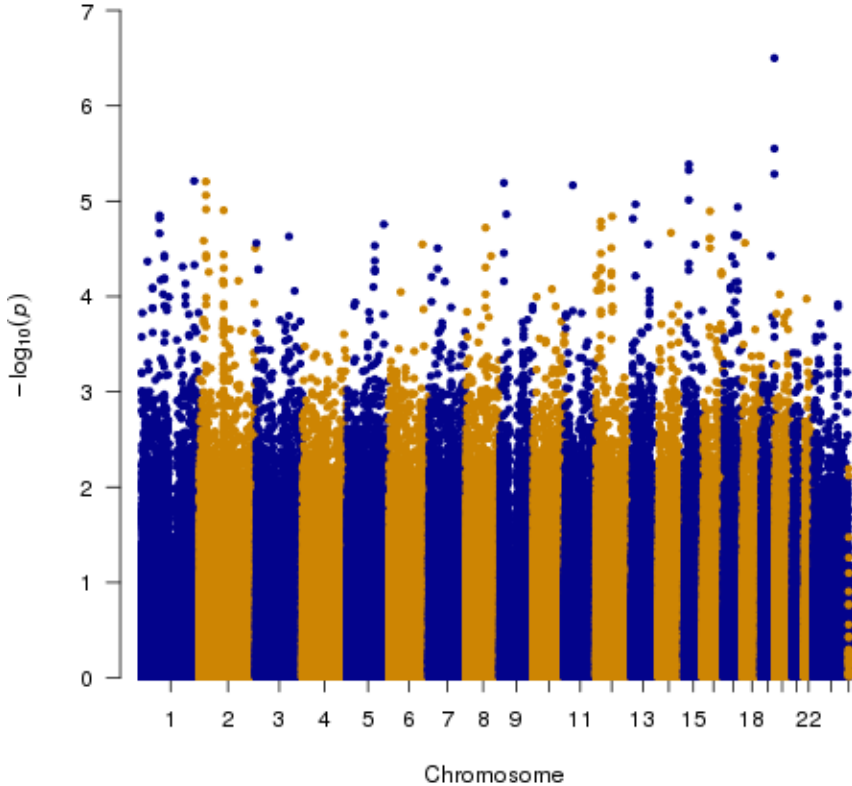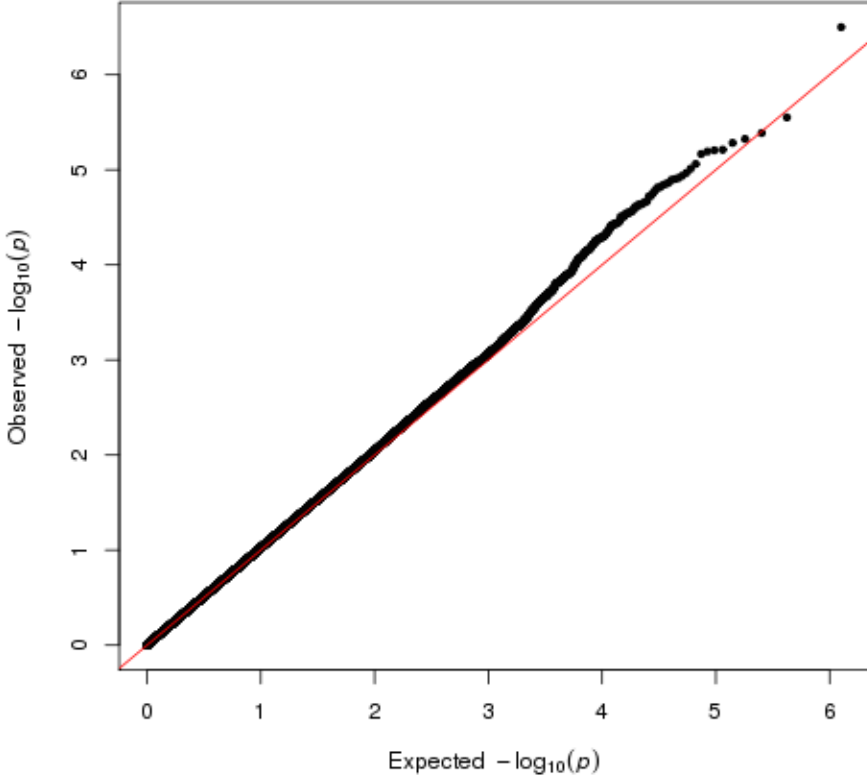

## Cholesterol

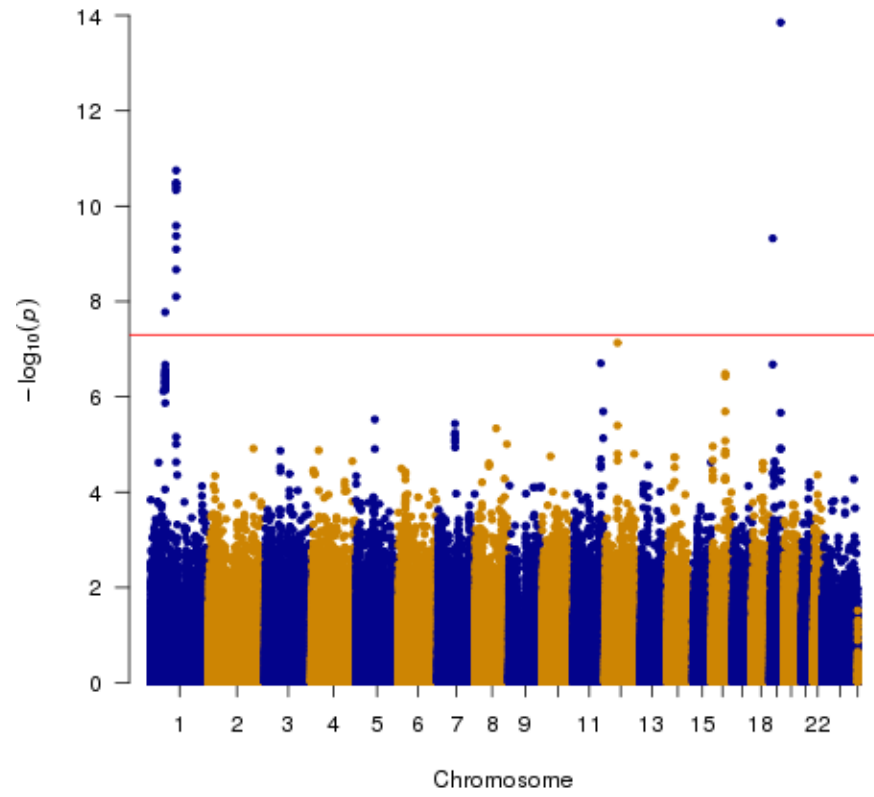

Genomic Inflation Factor is 1.03861543949955

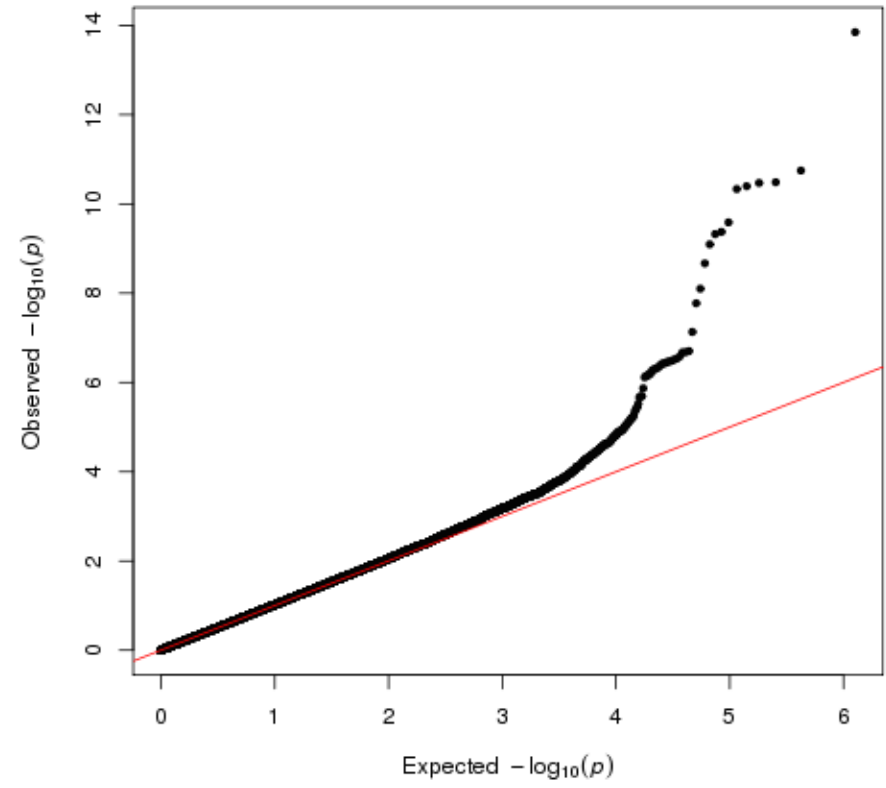

# Creatinine

Genomic Inflation Factor is 1.02137723914402

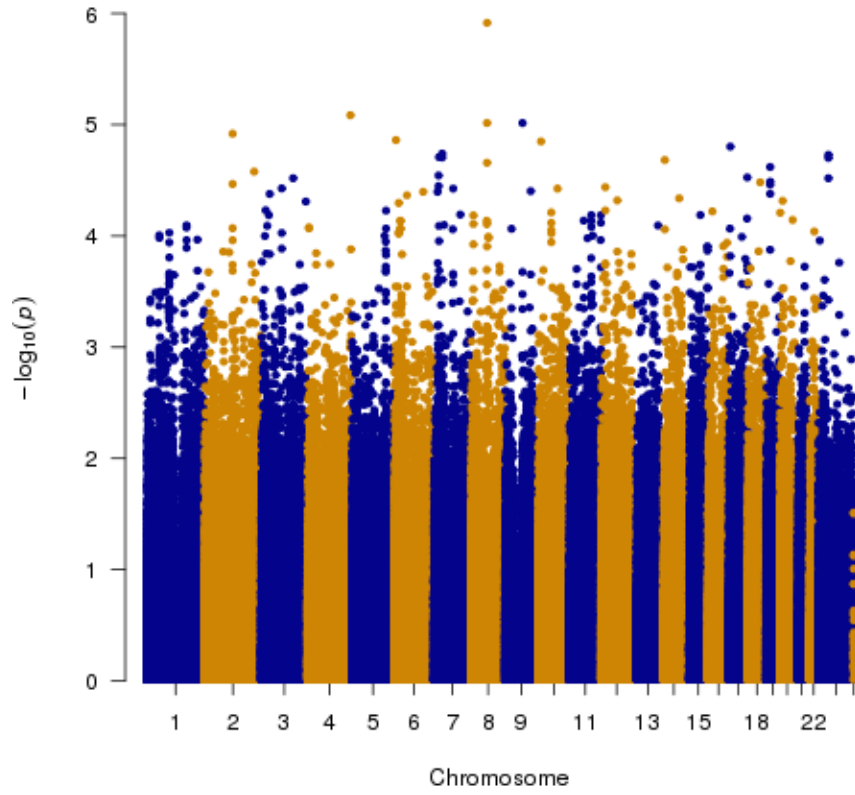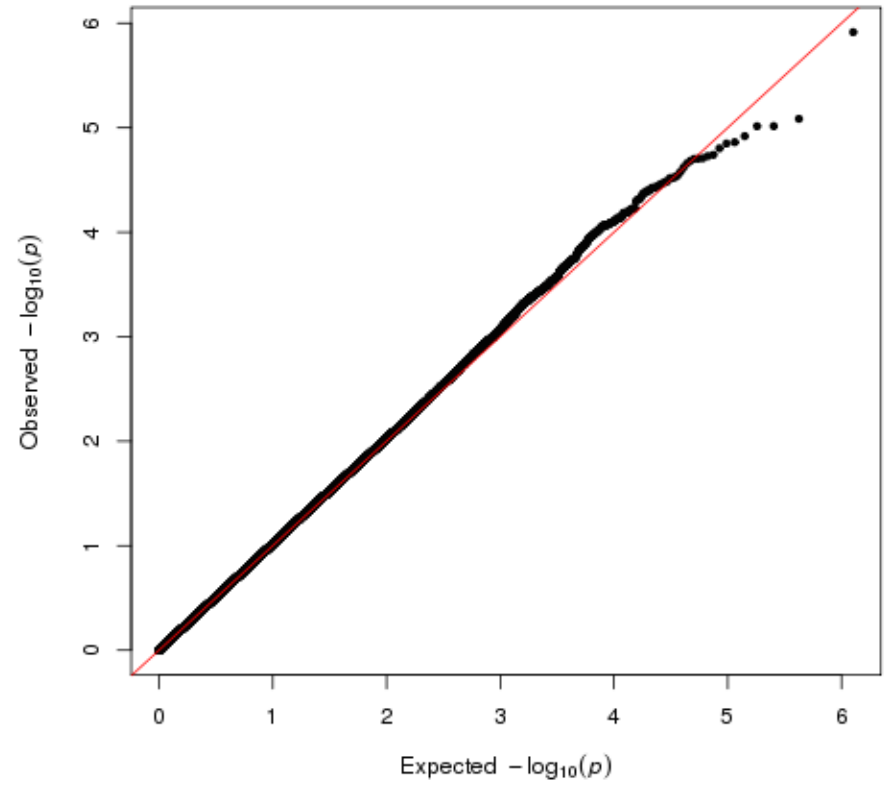

### Free T3

Genomic Inflation Factor is 1.01909752408458

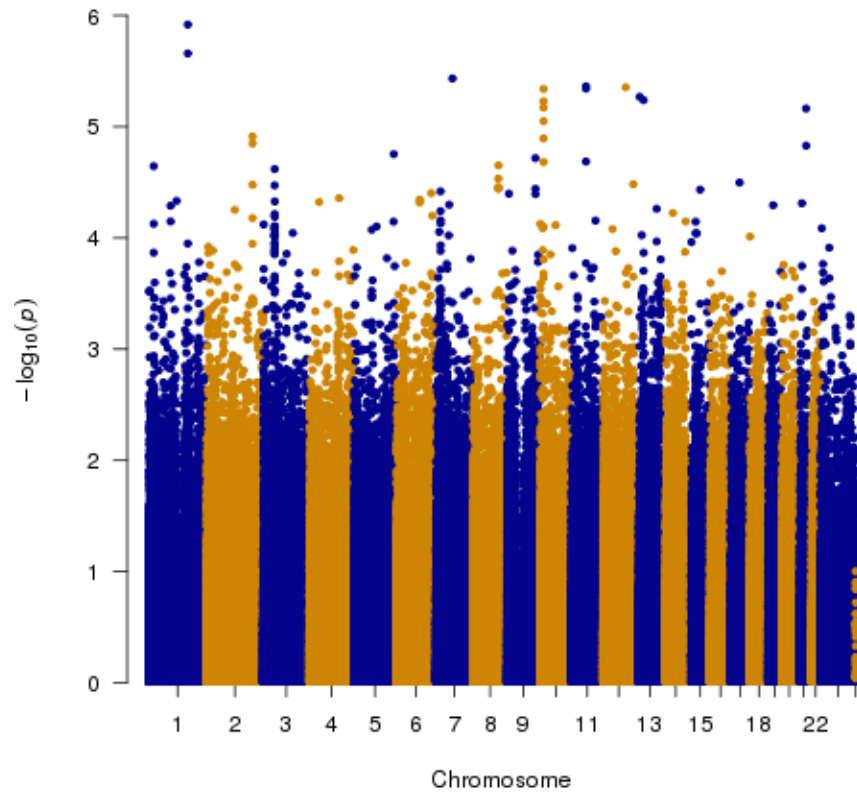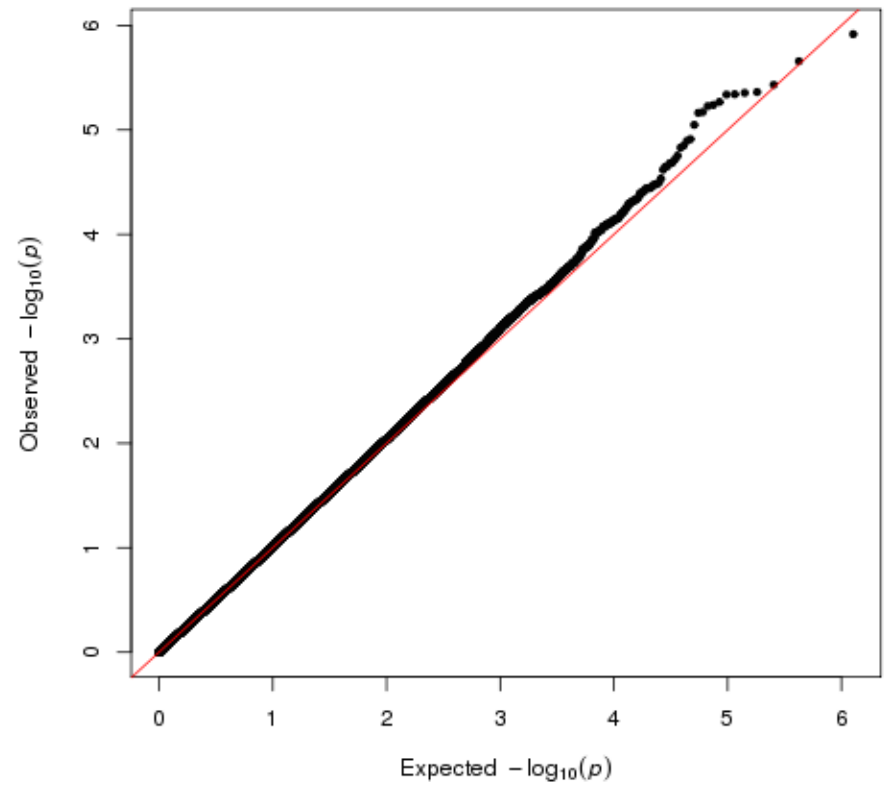

### Free T4 (Log Transform)

Genomic Inflation Factor is 0.994634136933098

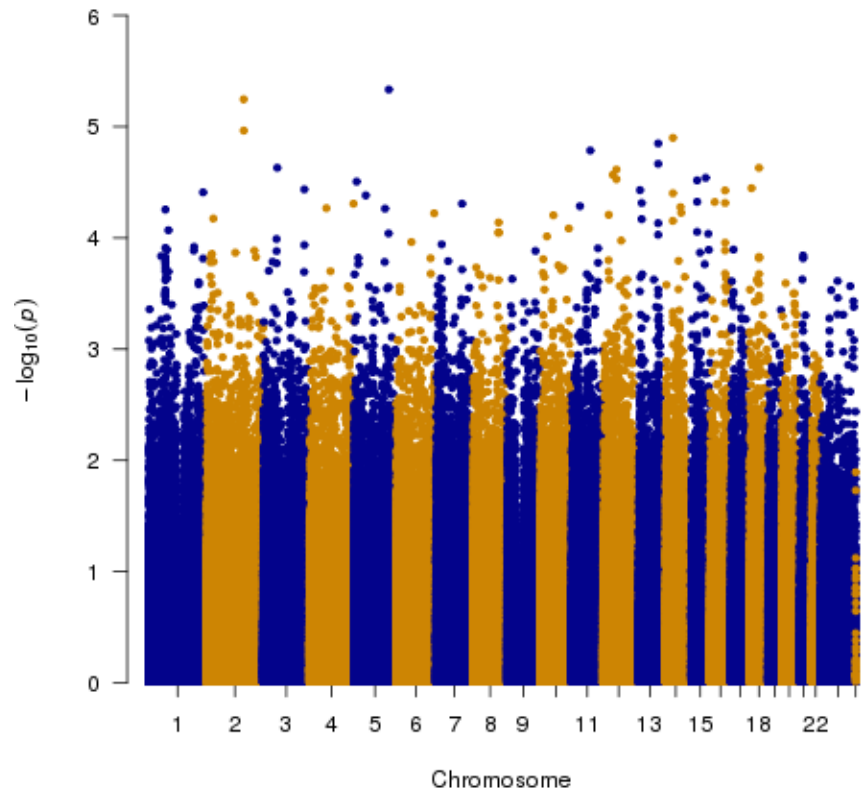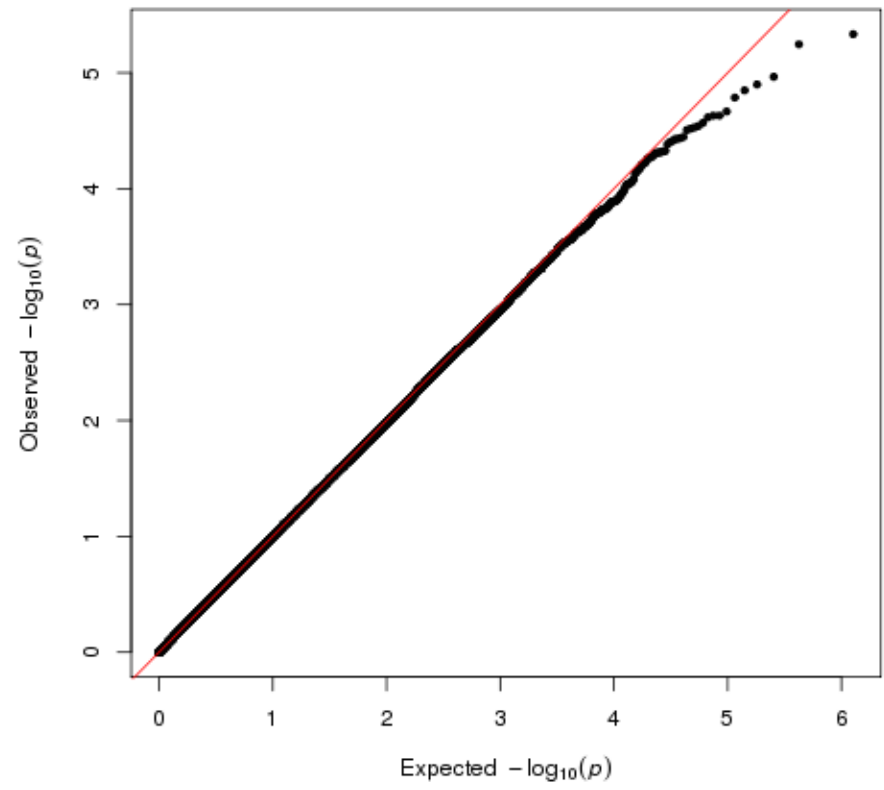

### Glucose (Log Transform)

Genomic Inflation Factor is 1.04610050813471

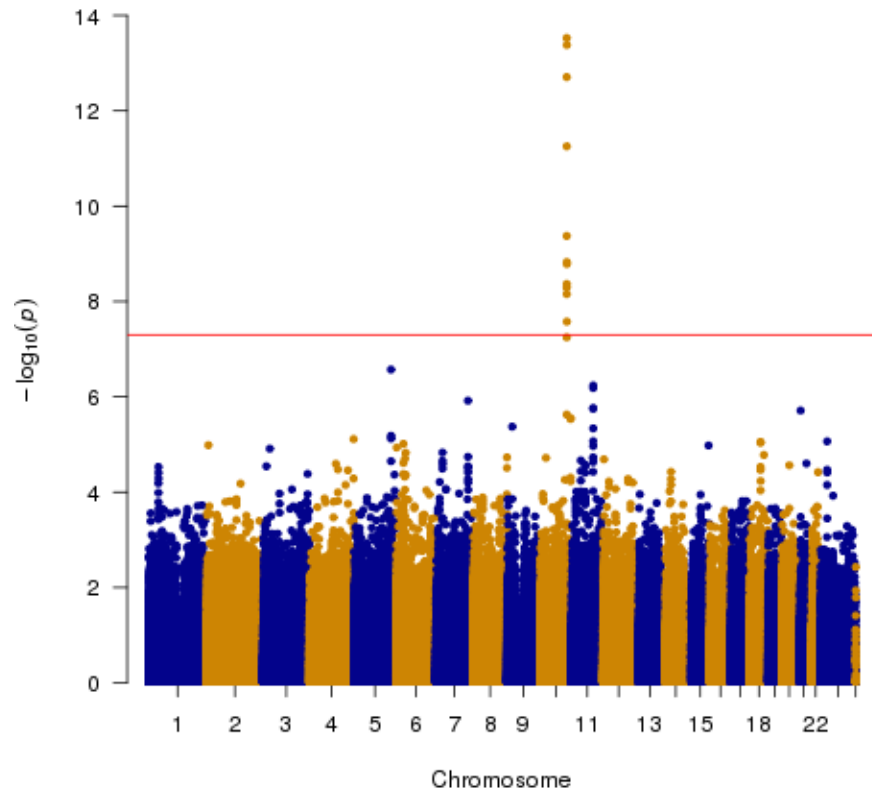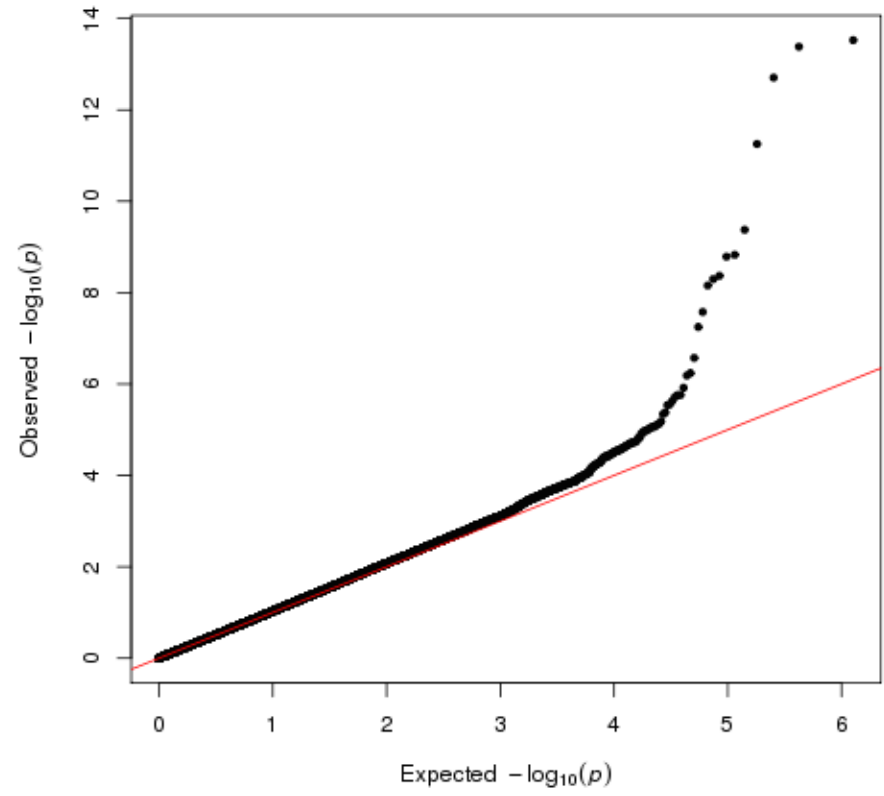

# Hemoglobin A1c

Genomic Inflation Factor is 1.04169847694333

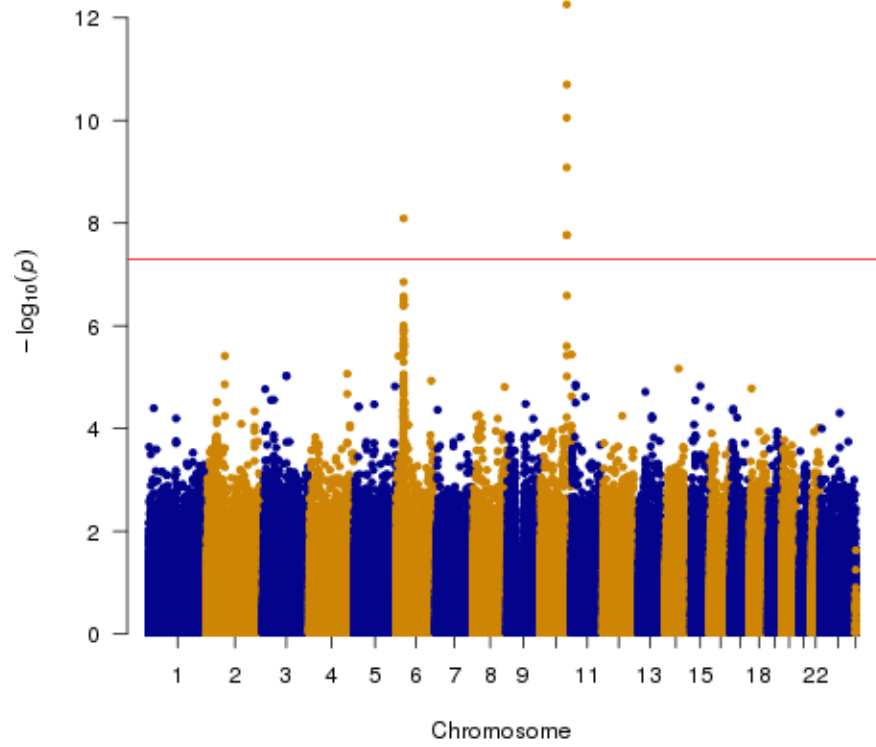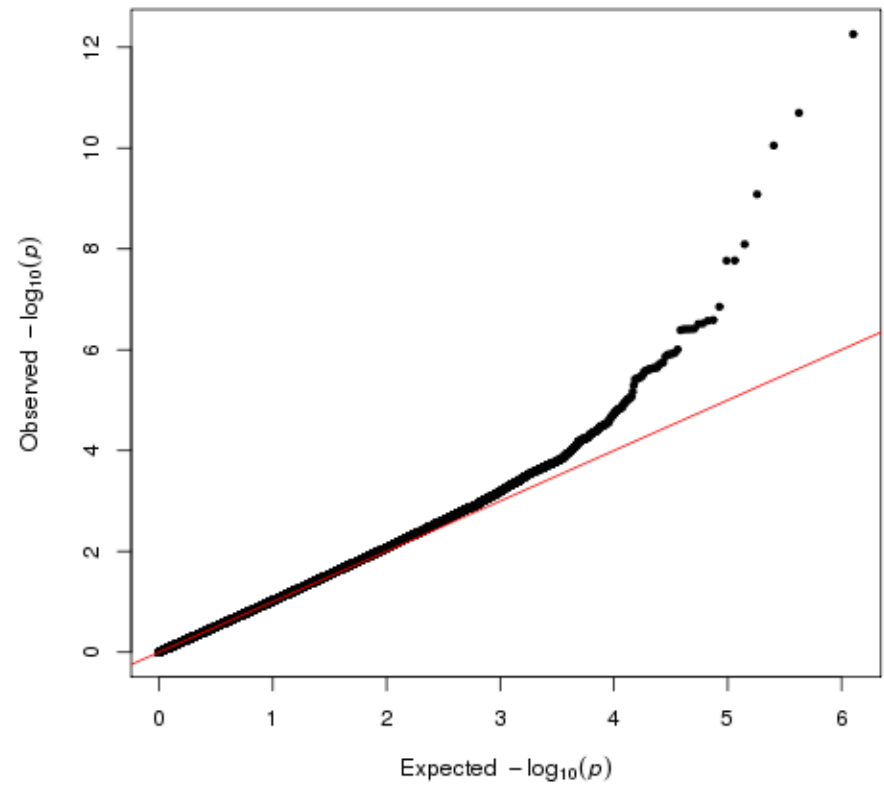

### High Density Lipoprotein (Log Transform)

Genomic Inflation Factor is 1.12722693928373

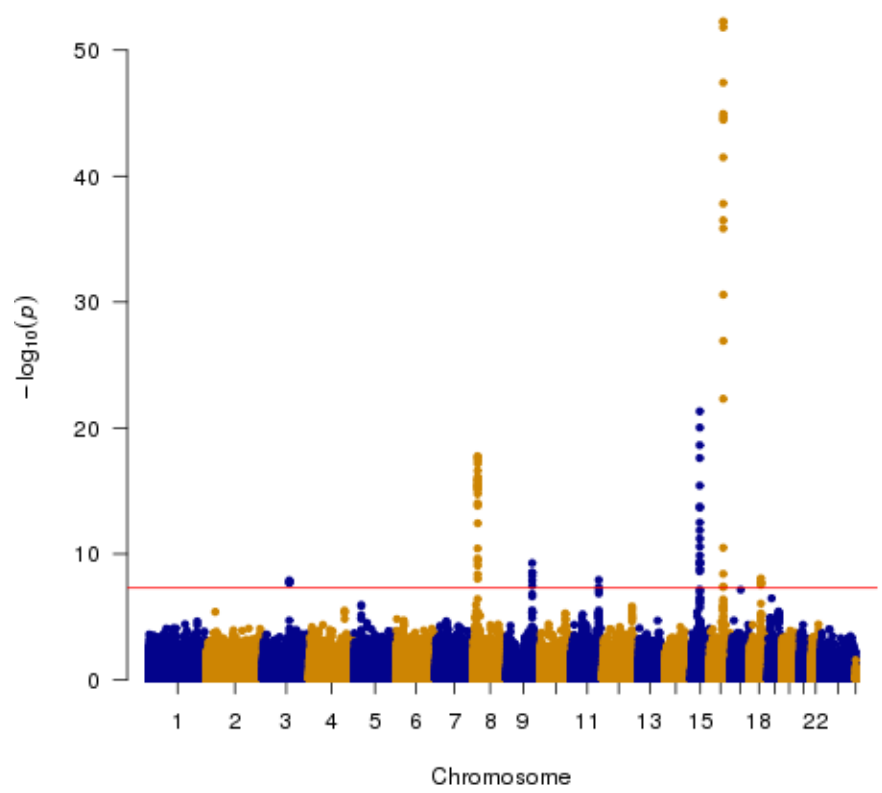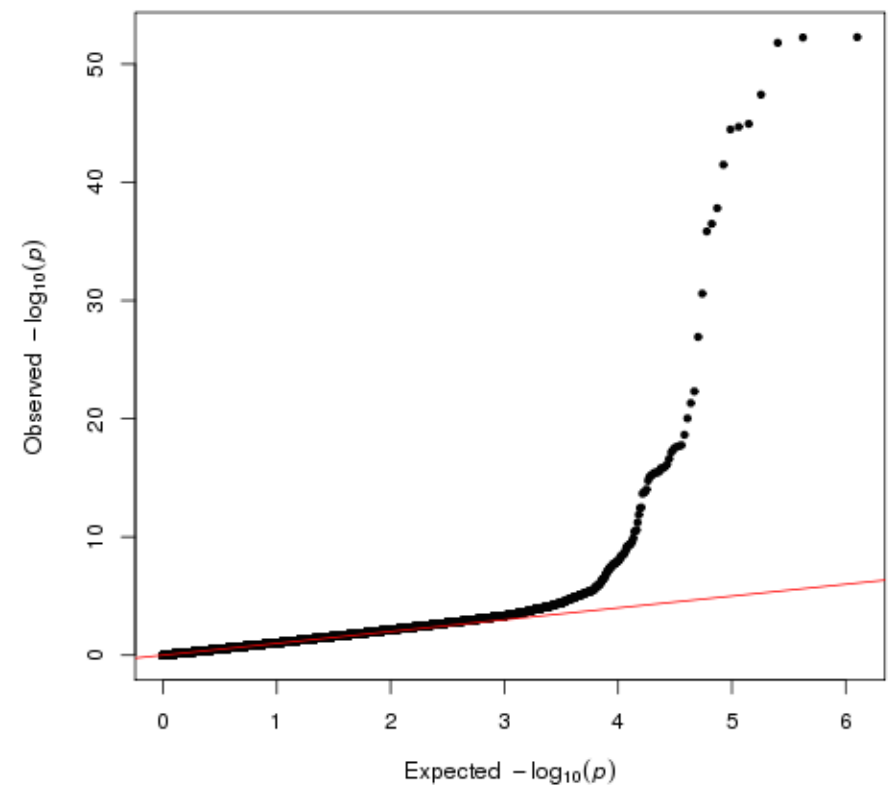



# Insulin-Like Growth Factor-1 (Log Transform)

Genomic Inflation Factor is 1.04924180854575

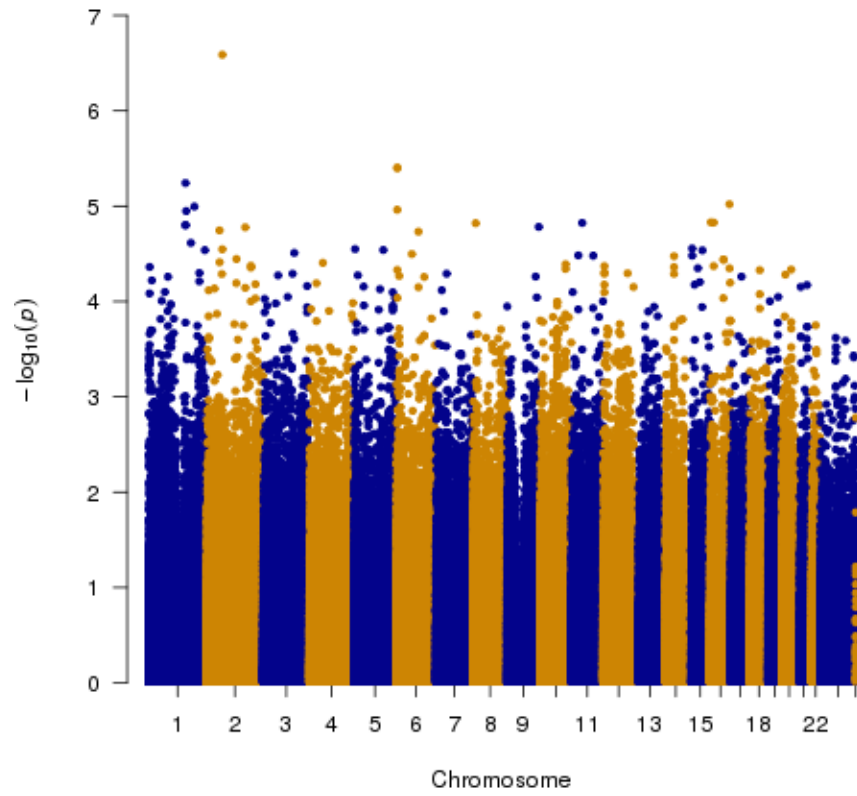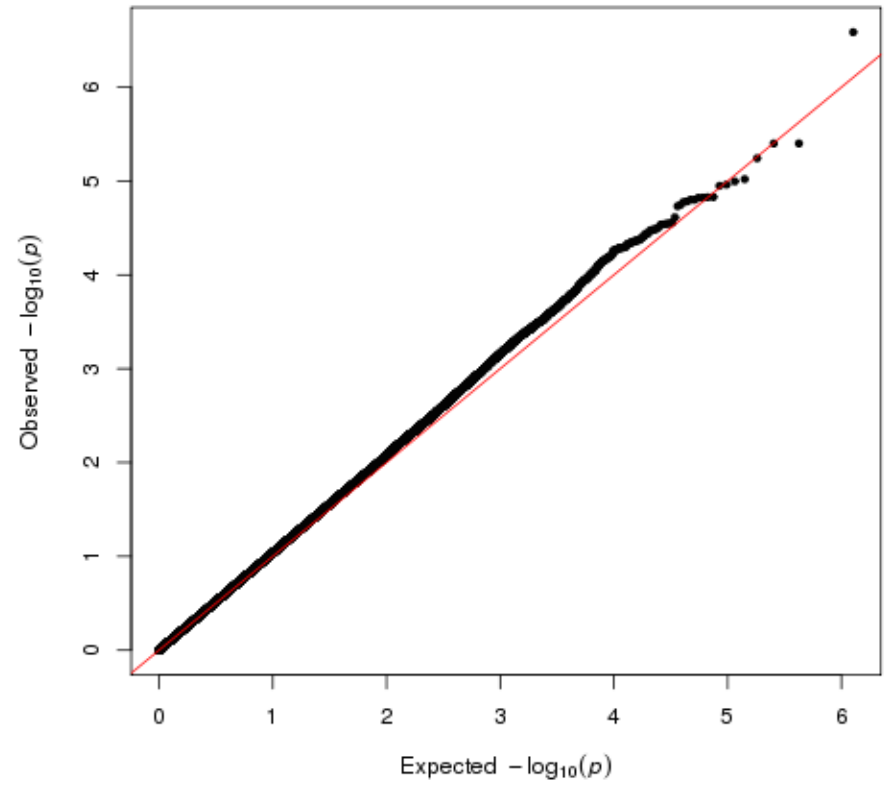

## Low Density Lipoprotein

Genomic Inflation Factor is 1.02632679841335

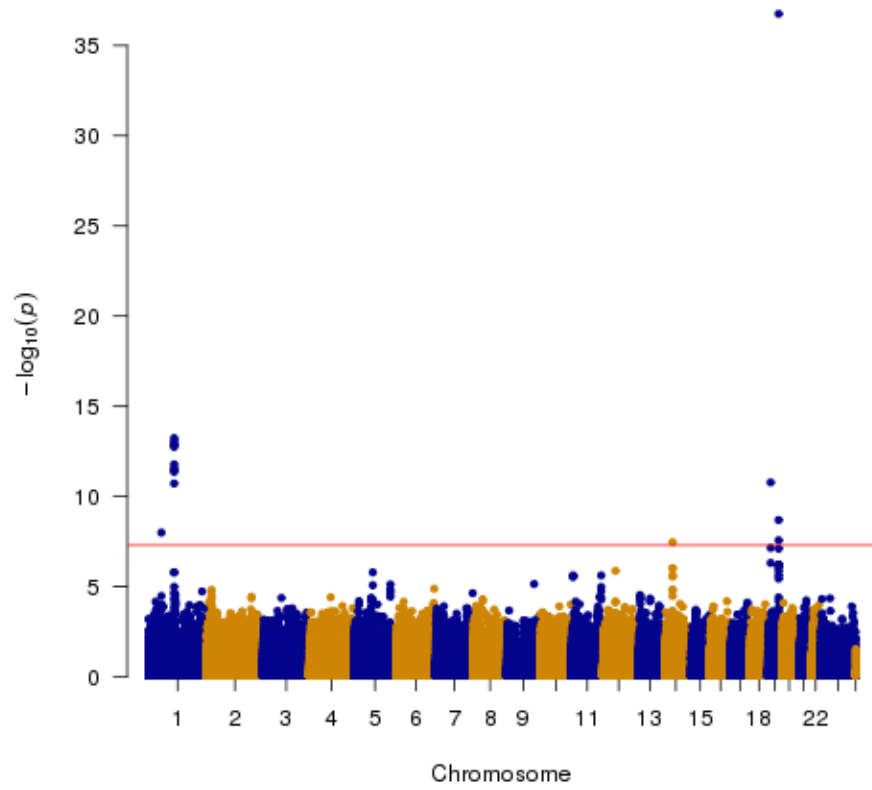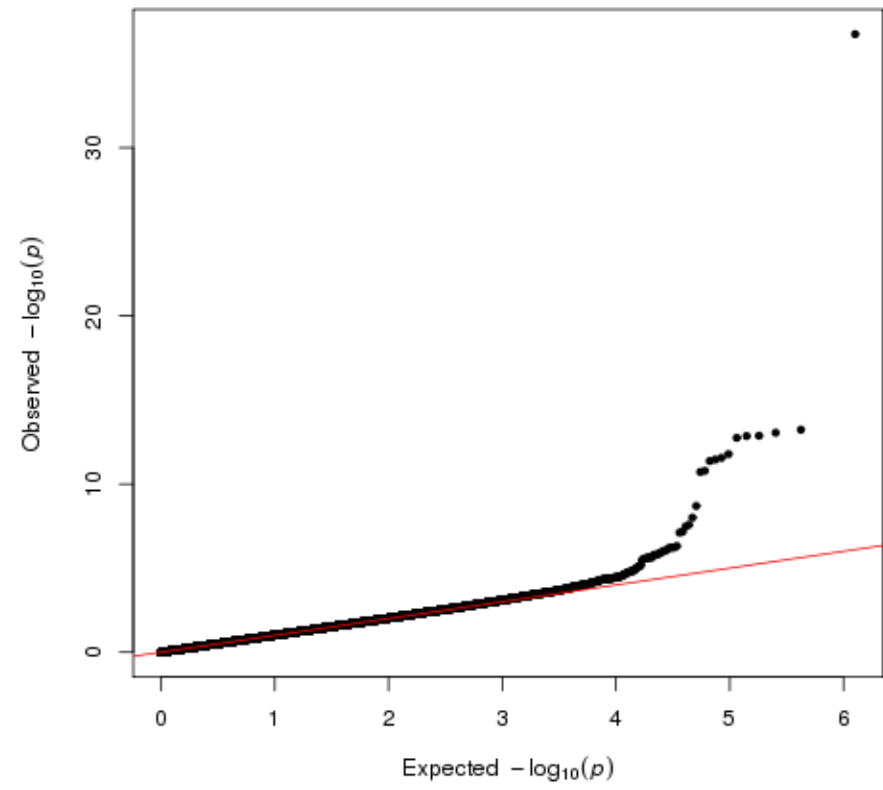

## Platelet Count

Genomic Inflation Factor is 1.0900758968758

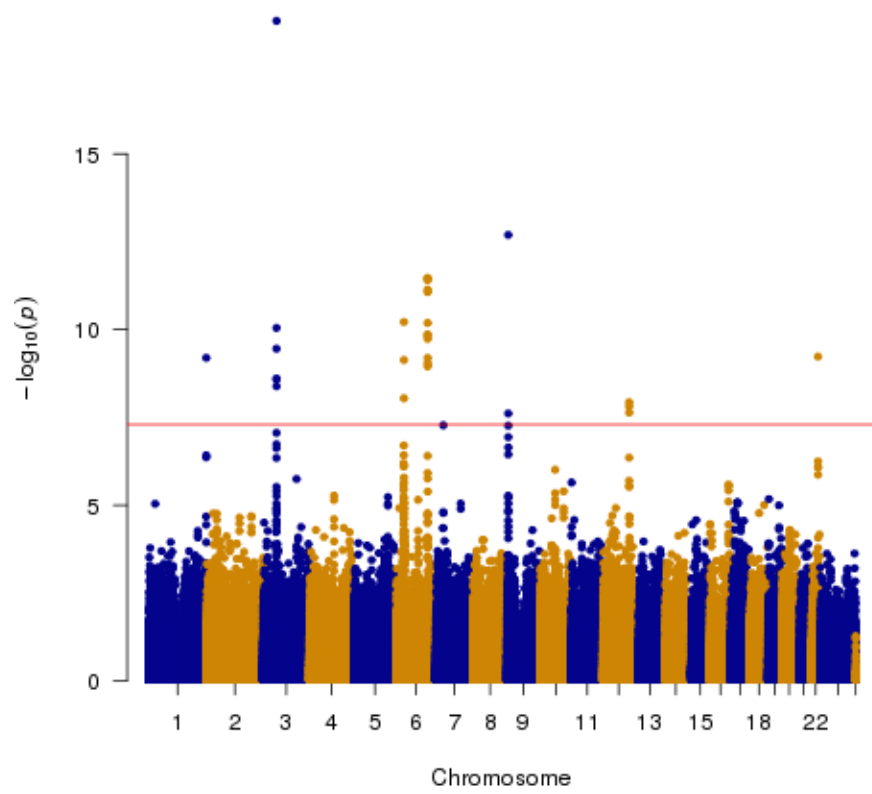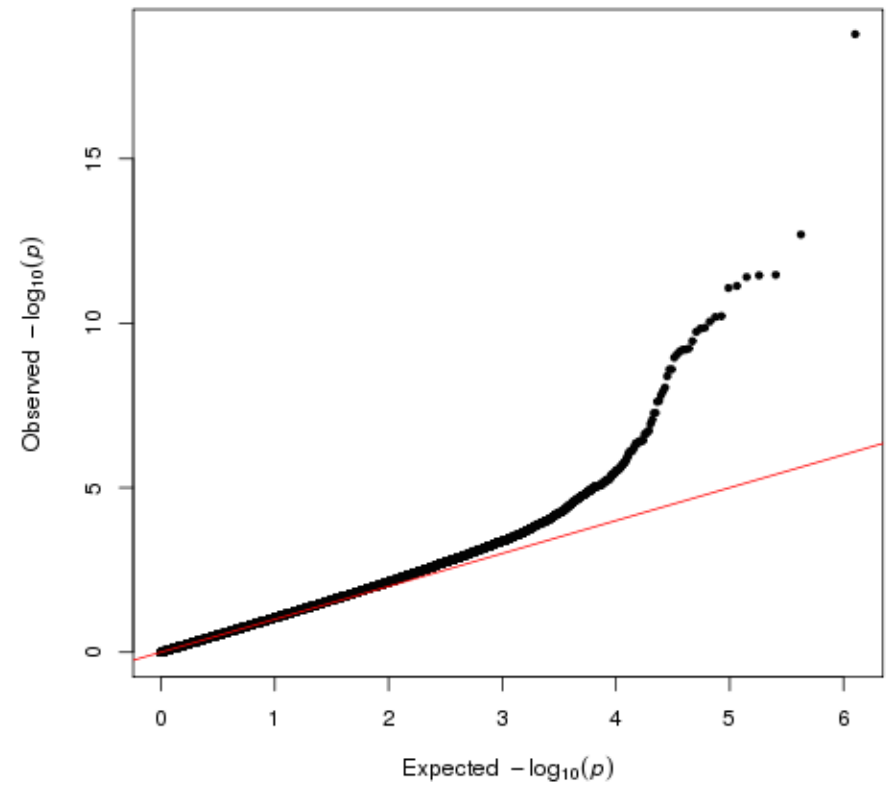

### Protein Urine (Log Transform)

Genomic Inflation Factor is 1.01001768028042

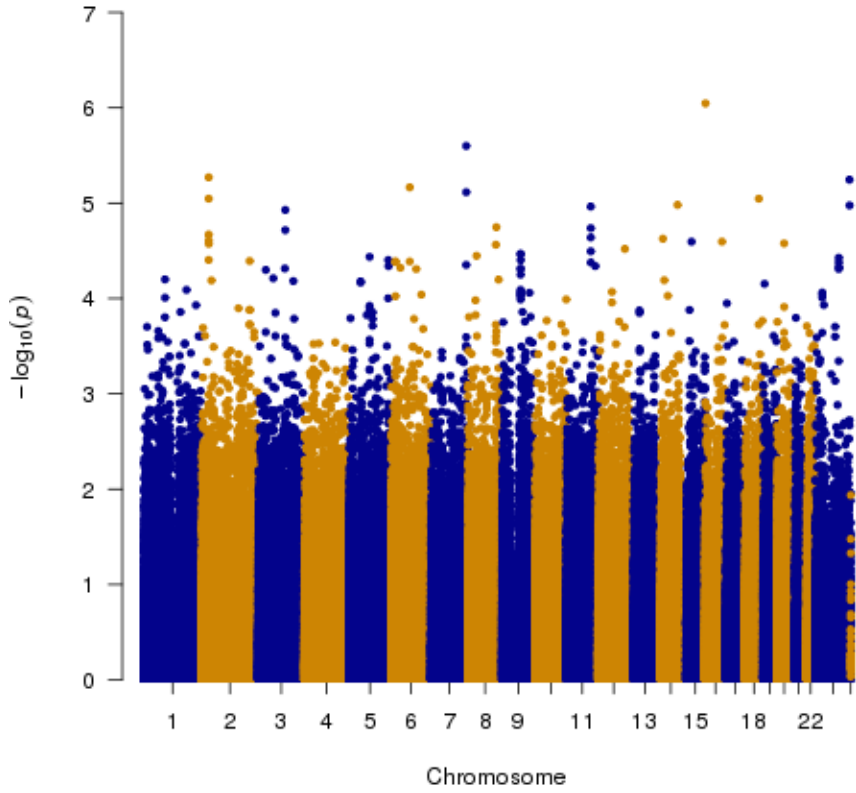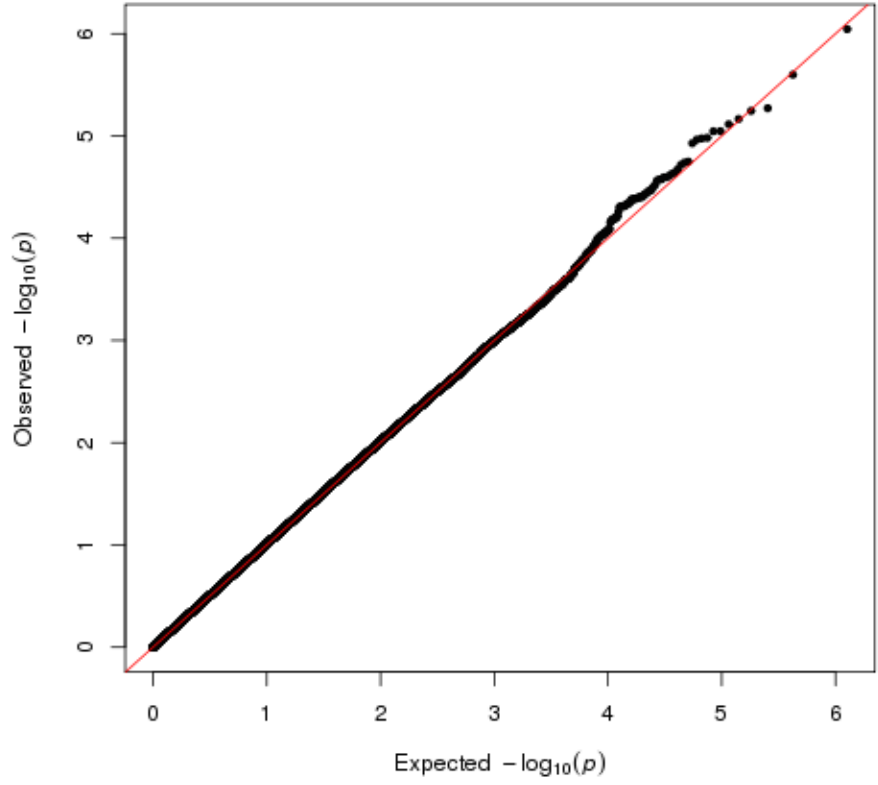

## Red Blood Cell Count

Genomic Inflation Factor is 1.08384120146952

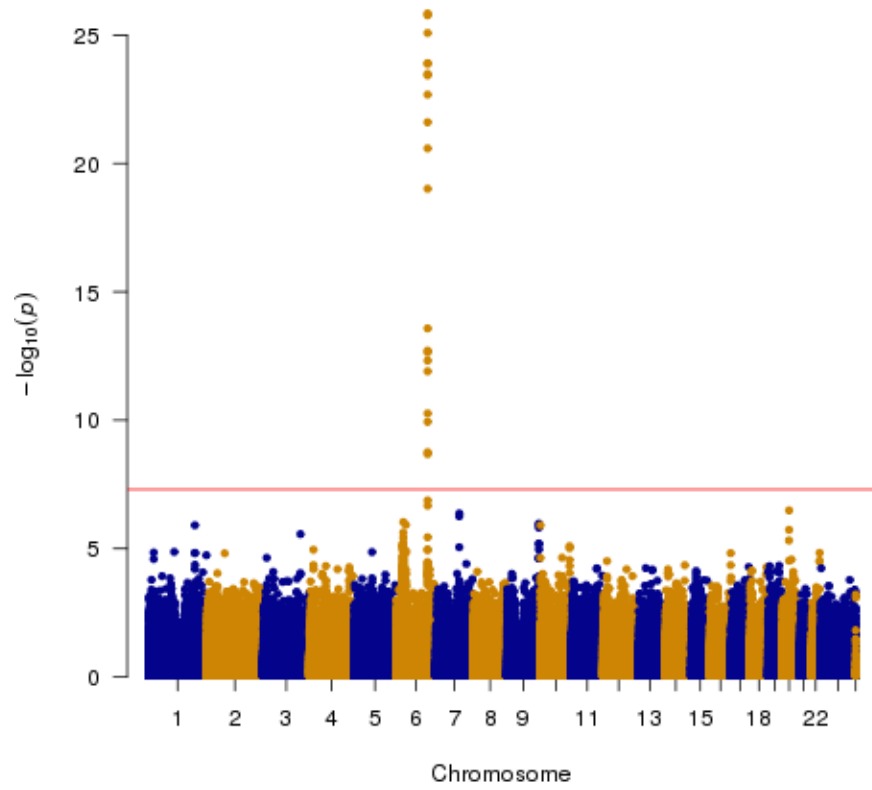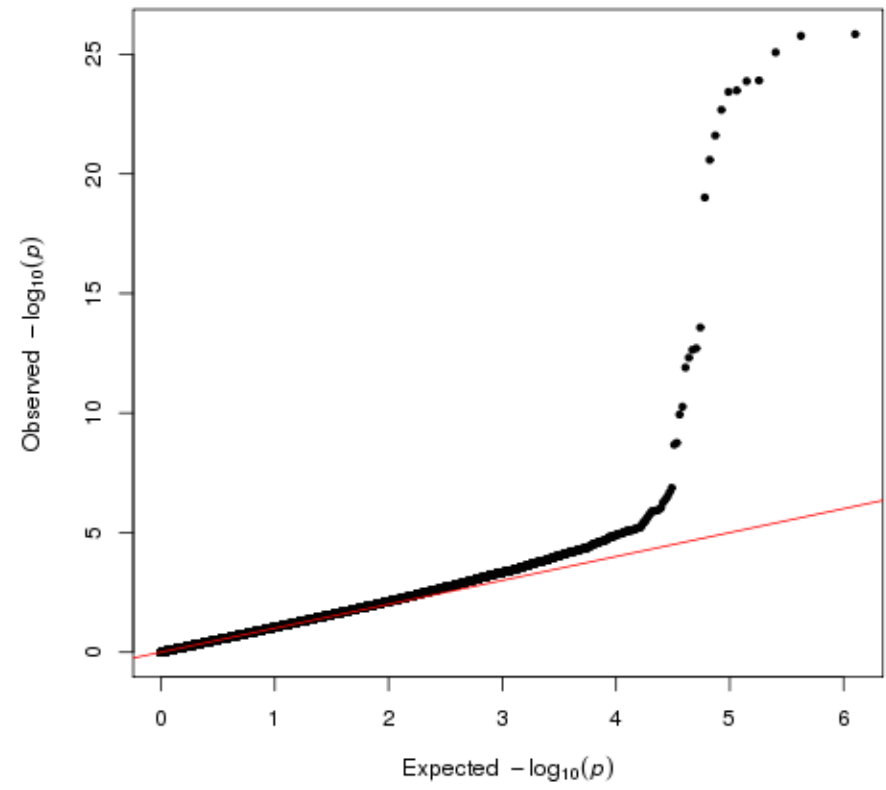

# Thyroid Globulin Antibody

Genomic Inflation Factor is 1.01748080326271

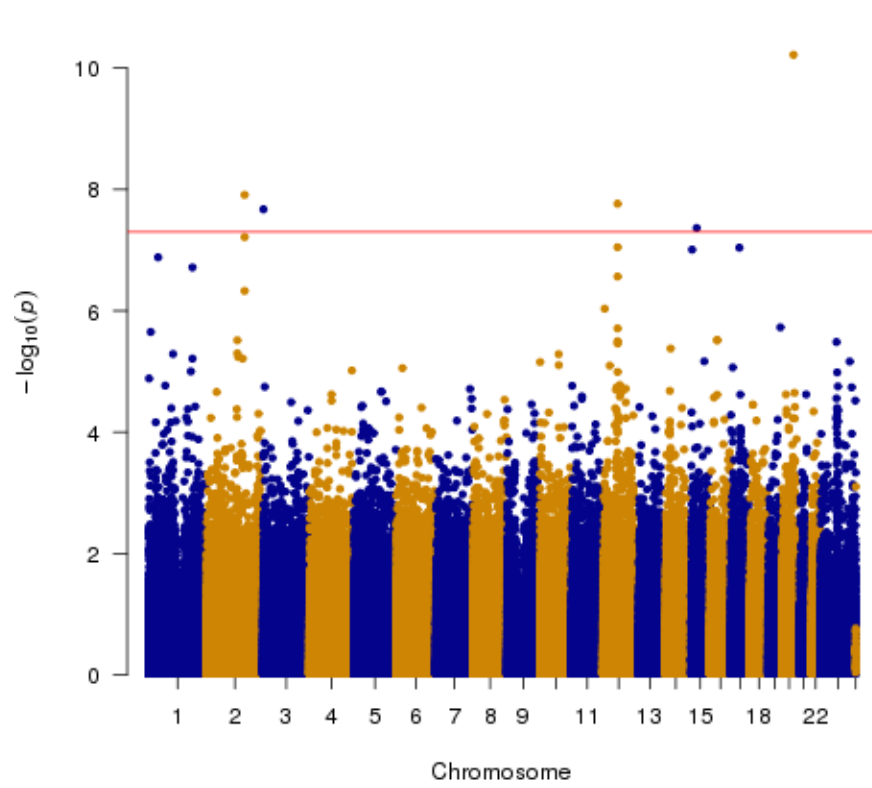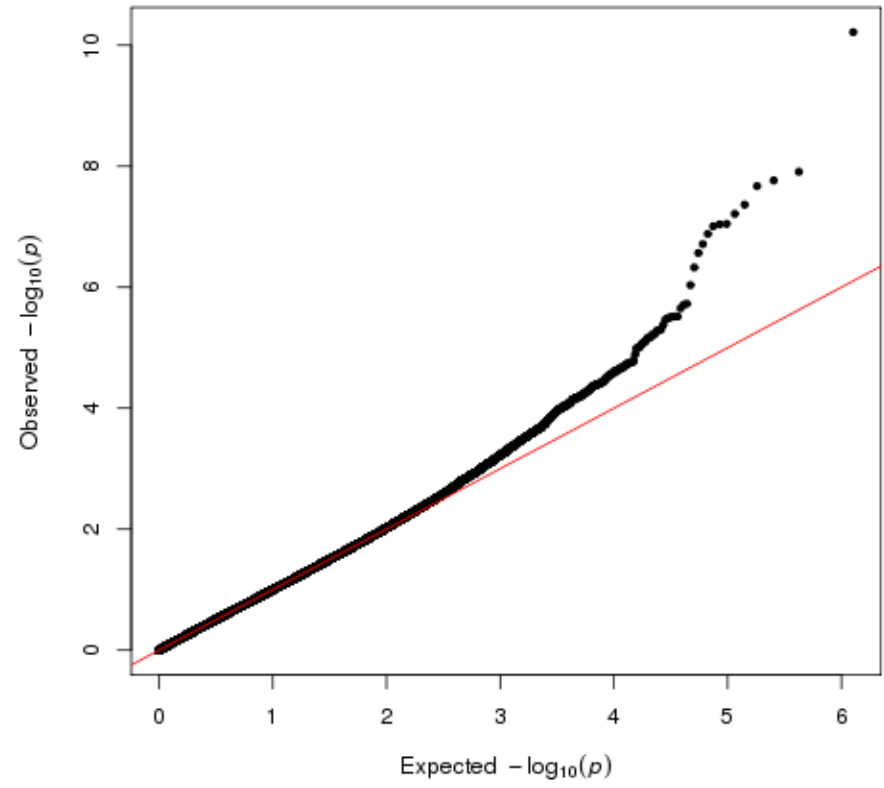

### Thyroidperoxidase Antibody (Log Transform)

Genomic Inflation Factor is 1.01816685662392

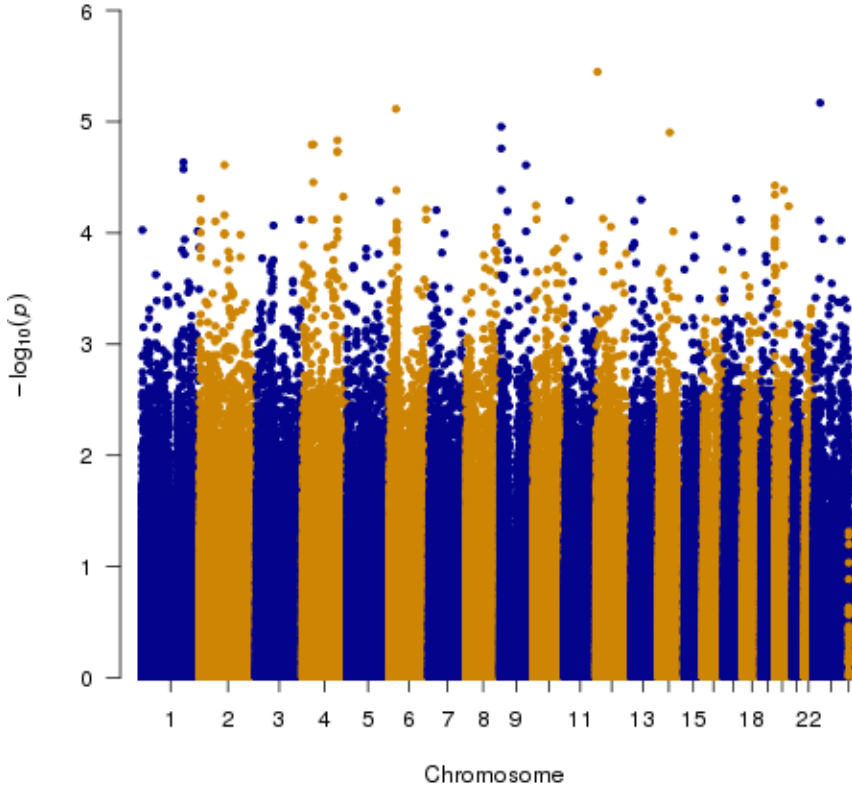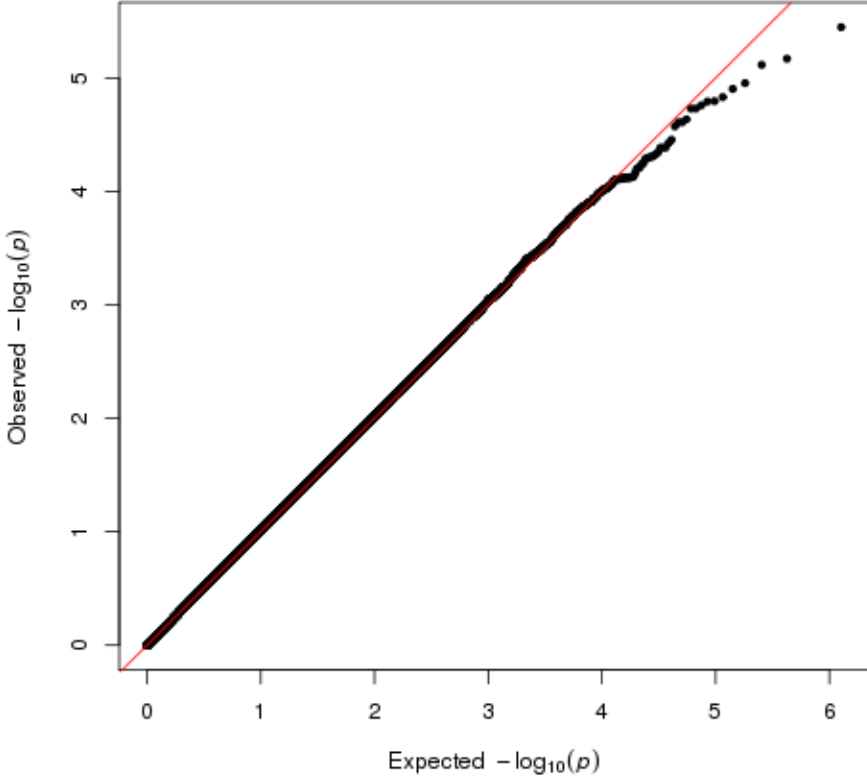

### Thyroid Stimulating Hormone (Log Transform)

Genomic Inflation Factor is 1.06533258684863

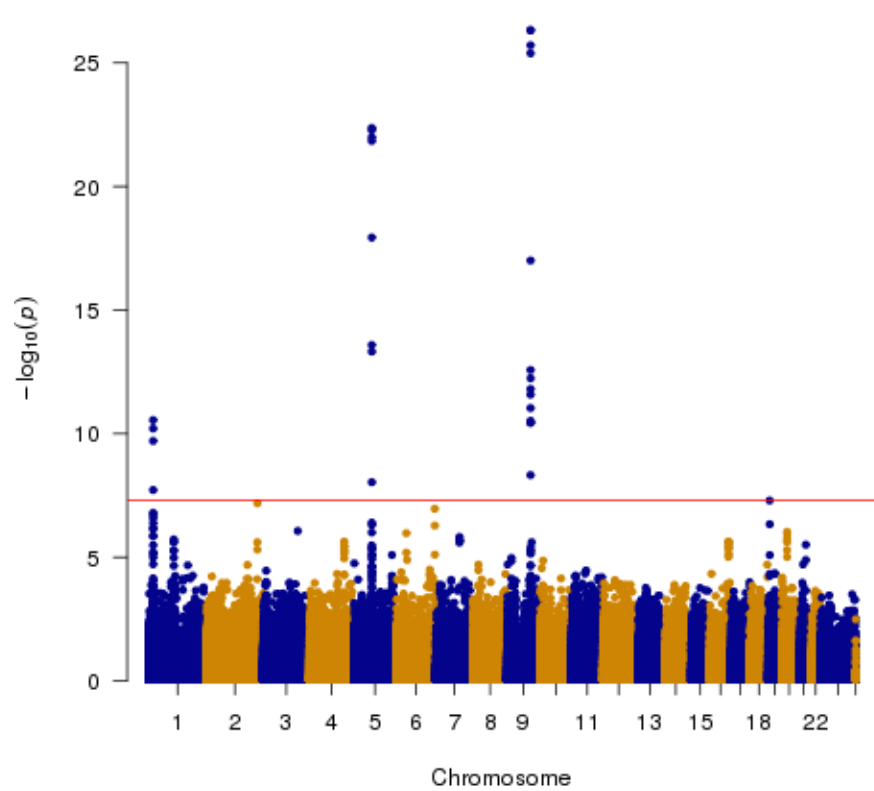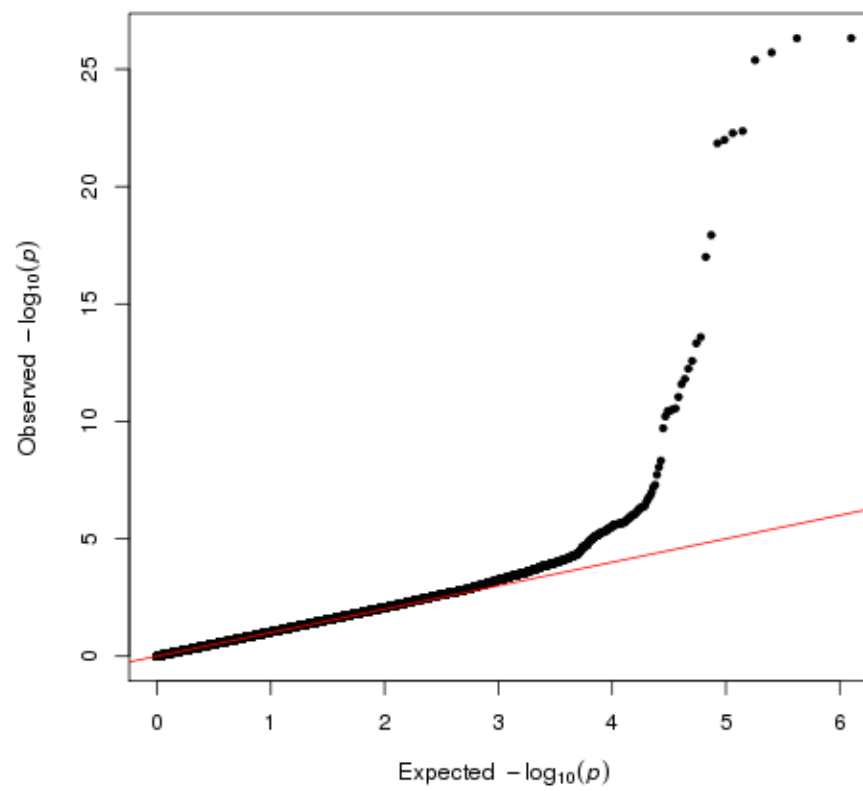



### Triglycerides (Log Transform)

Genomic Inflation Factor is 1.11045917460547

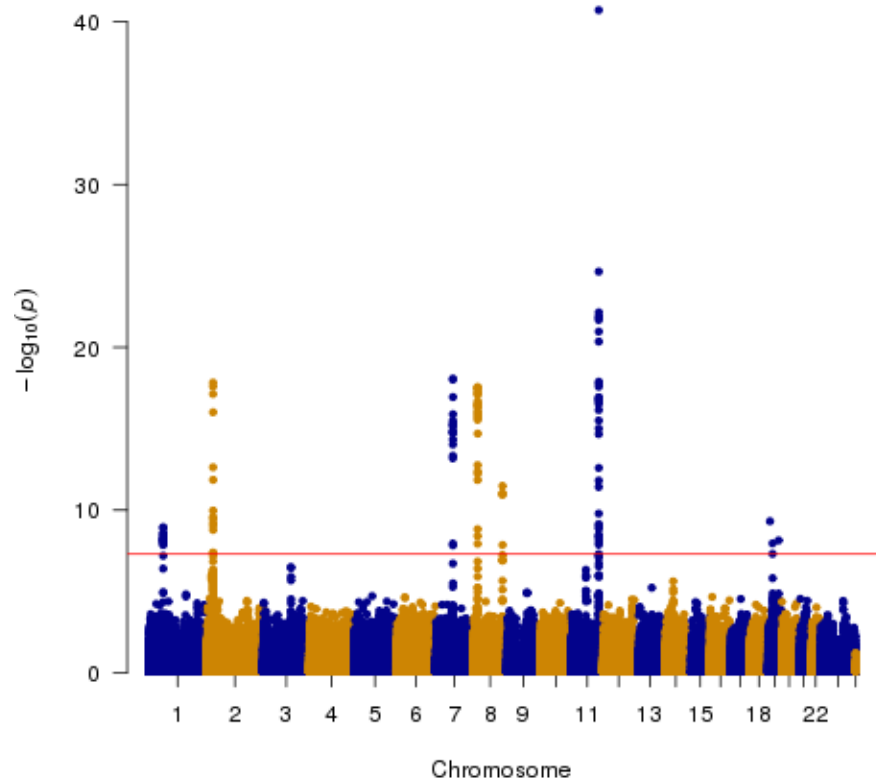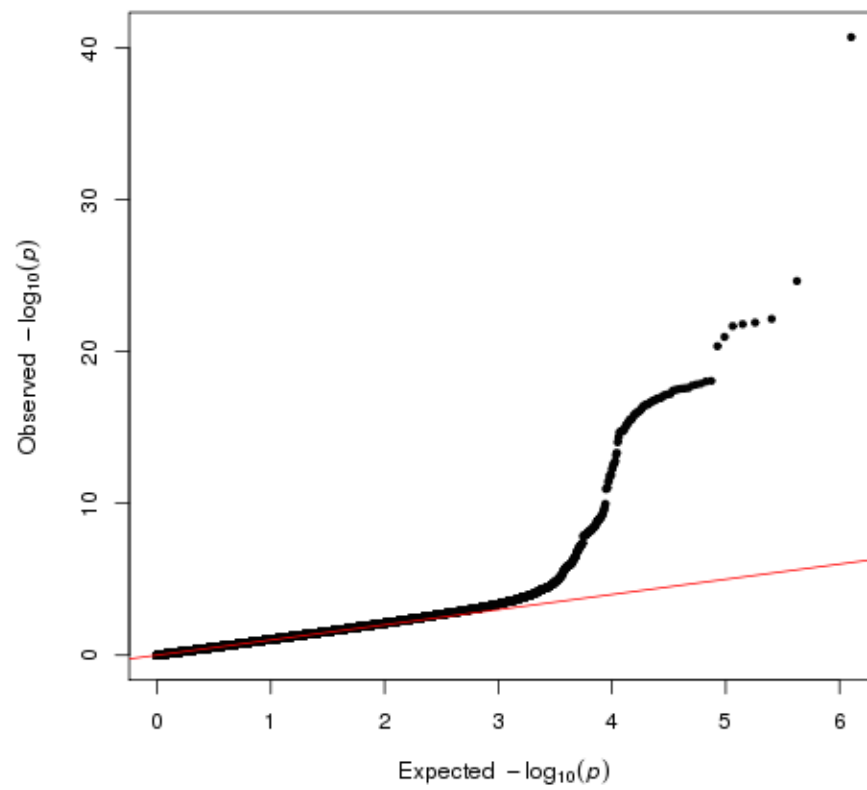

# White Blood Cell Count

Genomic Inflation Factor is 1.09920578761999

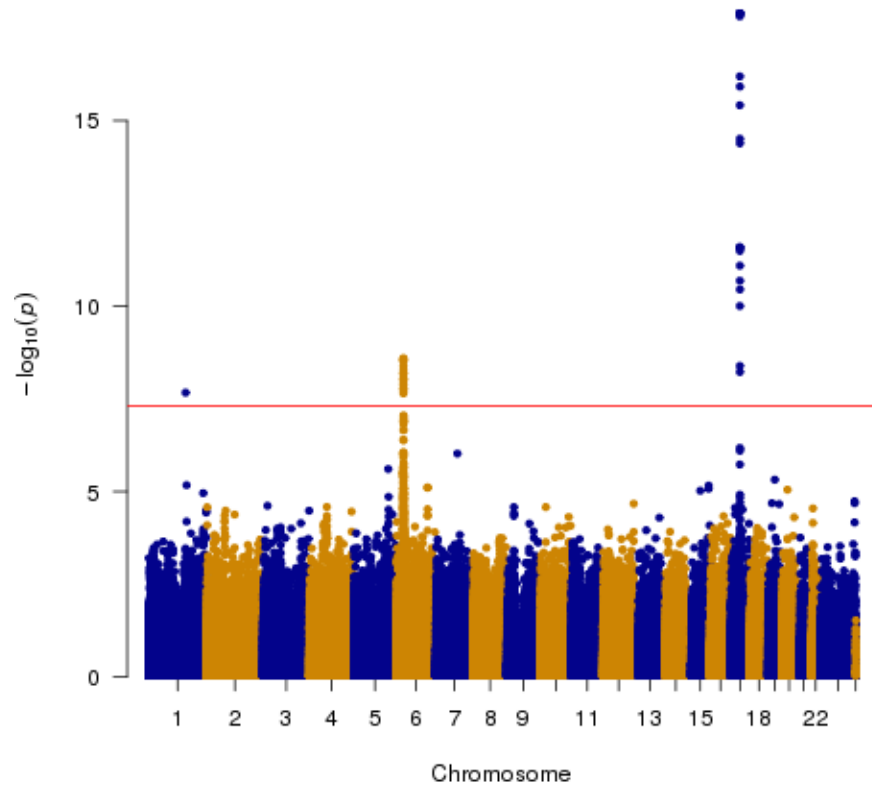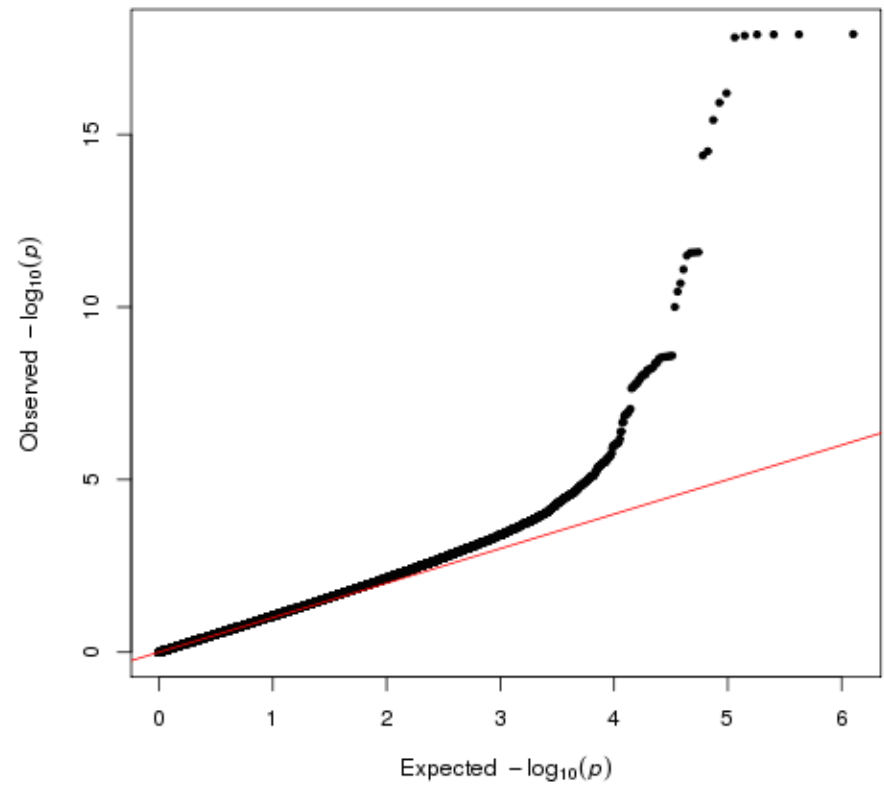

Supplement: NIHMS742521-supplement-2.pdf [file NIHMS742521-supplement-2.pdf]
